# Supplementary material for: Spatially resolved multimarker evaluation of CD274 (PD-L1)/PDCD1 (PD-1) immune checkpoint expression and macrophage polarisation in colorectal cancer
Source: PubMed Central journal article supplement (PMC10205752; doi:10.1038/s41416-023-02238-6), 2023-03-31
Supplement: 41416_2023_2238_MOESM1_ESM.pdf [file 41416_2023_2238_MOESM1_ESM.pdf]

**Supplementary tables****Table S1** Antibodies and multiplex immunohistochemistry protocols in the staining order.

| Marker | Clone   | Manufacturer      | Catalog number | Host species | Antigen retrieval | Antibody dilution, incubation time |
|--------|---------|-------------------|----------------|--------------|-------------------|------------------------------------|
| PD-L1  | E1L3N   | Cell Signaling    | 13684S         | rabbit       | ER2, 30 min       | 1:100, 30 min                      |
| CD3    | LN10    | Leica             | PA055          | mouse        | ER1, 60 min       | ready-to-use, 30 min               |
| PD-1   | SP269   | Abcam             | ab227681       | rabbit       | ER1, 30 min       | 1:40, 60 min                       |
| CD163  | 10D6    | Thermo Scientific | MS-1103        | mouse        | ER1, 60 min       | 1:100, 30 min                      |
| CD86   | E2G8P   | Cell Signaling    | 91882S         | rabbit       | ER1, 30 min       | 1:50, 30 min                       |
| HLA-DR | TAL 1B5 | Santa Cruz        | sc-53319       | mouse        | ER1, 60 min       | 1:4000, 30 min                     |
| MRC1   | E2L9N   | Cell Signaling    | 91992S         | rabbit       | ER1, 30 min       | 1:500, 30 min                      |
| CD68   | KP1     | Biolegend         | 916104         | mouse        | ER1, 30 min       | 1:40 000, 30 min                   |
| KRT    | BS5     | BioSite Histo     | BSH-7124-1     | mouse        | ER1, 60 min       | 1:400, 30 min                      |

**Table S2** Demographic and clinical characteristics of colorectal cancer cases according to PD-L1 expression in tumor cells.

| Characteristic                                | Total N    | PD-L1 expression in tumor cells |           | <i>P</i> |
|-----------------------------------------------|------------|---------------------------------|-----------|----------|
|                                               |            | positive                        | negative  |          |
| All cases                                     | 910 (100%) | 66 (7%)                         | 844 (93%) |          |
| Sex                                           |            |                                 |           | 0.16     |
| Male                                          | 462 (51%)  | 28 (42%)                        | 434 (51%) |          |
| Female                                        | 448 (49%)  | 38 (58%)                        | 410 (49%) |          |
| Tumor location                                |            |                                 |           | <0.0001  |
| Proximal colon                                | 445 (49%)  | 53 (80%)                        | 392 (46%) |          |
| Distal colon                                  | 332 (36%)  | 8 (12%)                         | 324 (38%) |          |
| Rectum                                        | 133 (15%)  | 5 (7.6%)                        | 128 (15%) |          |
| AJCC stage                                    |            |                                 |           | 0.011    |
| I                                             | 151 (17%)  | 6 (9.1%)                        | 145 (17%) |          |
| II                                            | 342 (38%)  | 37 (56%)                        | 305 (36%) |          |
| III                                           | 301 (33%)  | 18 (27%)                        | 283 (34%) |          |
| IV                                            | 116 (13%)  | 5 (7.6%)                        | 111 (13%) |          |
| Tumor grade                                   |            |                                 |           | <0.0001  |
| Low-grade (well to moderately differentiated) | 760 (84%)  | 38 (58%)                        | 722 (86%) |          |
| High-grade (poorly differentiated)            | 150 (16%)  | 28 (42%)                        | 122 (15%) |          |
| Lymphovascular invasion                       |            |                                 |           | 0.37     |
| No                                            | 719 (79%)  | 55 (83%)                        | 664 (79%) |          |
| Yes                                           | 191 (21%)  | 11 (17%)                        | 180 (21%) |          |
| MMR status                                    |            |                                 |           | <0.0001  |
| MMR proficient                                | 773 (85%)  | 36 (55%)                        | 737 (87%) |          |
| MMR deficient                                 | 137 (15%)  | 30 (46%)                        | 107 (13%) |          |
| <i>BRAF</i> status                            |            |                                 |           | <0.0001  |
| Wild-type                                     | 763 (84%)  | 37 (56%)                        | 726 (86%) |          |
| Mutant                                        | 147 (16%)  | 29 (44%)                        | 118 (14%) |          |

Tumors were categorized into PD-L1 negative or positive using histoscore method with a cut-off >5 for the positivity. Abbreviations: AJCC, American Joint Committee on Cancer; MMR, mismatch repair.

**Table S3** Multivariable Cox regression models for cancer-specific survival according to PD-L1<sup>+</sup> and PD-L1<sup>-</sup> macrophage densities in the tumor center and the invasive margin with all variables.

|                                               | PD-L1 <sup>+</sup> macrophage density |                                | PD-L1 <sup>-</sup> macrophage density |                                |
|-----------------------------------------------|---------------------------------------|--------------------------------|---------------------------------------|--------------------------------|
|                                               | Tumor center<br>HR (95% CI)           | Invasive margin<br>HR (95% CI) | Tumor center<br>HR (95% CI)           | Invasive margin<br>HR (95% CI) |
| PD-L1 <sup>+</sup> macrophage density         |                                       |                                | Not included                          | Not included                   |
| Q1                                            | 1 (referent)                          | 1 (referent)                   |                                       |                                |
| Q2                                            | 0.81 (0.57-1.13)                      | 1.07 (0.78-1.48)               |                                       |                                |
| Q3                                            | 0.75 (0.53-1.06)                      | 0.68 (0.47-0.99)               |                                       |                                |
| Q4                                            | 0.63 (0.43-0.93)                      | 0.52 (0.34-0.78)               |                                       |                                |
| PD-L1 <sup>-</sup> macrophage density         | Not included                          | Not included                   |                                       |                                |
| Q1                                            |                                       |                                | 1 (referent)                          | 1 (referent)                   |
| Q2                                            |                                       |                                | 0.75 (0.51-1.09)                      | 1.33 (0.91-1.94)               |
| Q3                                            |                                       |                                | 0.88 (0.61-1.27)                      | 1.02 (0.69-1.50)               |
| Q4                                            |                                       |                                | 0.85 (0.60-1.21)                      | 1.36 (0.96-1.92)               |
| Age                                           |                                       |                                |                                       |                                |
| <65                                           | 1 (referent)                          | 1 (referent)                   | 1 (referent)                          | 1 (referent)                   |
| 65–75                                         | 1.18 (0.86-1.64)                      | 1.14 (0.83-1.48)               | 1.21 (0.87-1.67)                      | 1.15 (0.83-1.59)               |
| >75                                           | 1.96 (1.42-2.72)                      | 1.96 (1.41-2.71)               | 1.95 (1.41-2.71)                      | 1.90 (1.37-2.63)               |
| Sex                                           |                                       |                                |                                       |                                |
| Male                                          | 1 (referent)                          | 1 (referent)                   | 1 (referent)                          | 1 (referent)                   |
| Female                                        | 0.87 (0.67-1.14)                      | 0.85 (0.65-1.11)               | 0.87 (0.67-1.14)                      | 0.87 (0.67-1.14)               |
| Year of operation                             |                                       |                                |                                       |                                |
| 2000–2005                                     | 1 (referent)                          | 1 (referent)                   | 1 (referent)                          | 1 (referent)                   |
| 2006–2010                                     | 0.60 (0.44-0.82)                      | 0.59 (0.43-0.81)               | 0.59 (0.43-0.81)                      | 0.61 (0.44-0.83)               |
| 2011–2015                                     | 0.44 (0.32-0.61)                      | 0.43 (0.31-0.59)               | 0.43 (0.31-0.60)                      | 0.44 (0.32-0.61)               |
| Tumor location                                |                                       |                                |                                       |                                |
| Proximal colon                                | 1 (referent)                          | 1 (referent)                   | 1 (referent)                          | 1 (referent)                   |
| Distal colon                                  | 0.95 (0.71-1.27)                      | 0.95 (0.72-1.27)               | 0.98 (0.73-1.30)                      | 0.94 (0.70-1.26)               |
| Rectum                                        | 0.81 (0.54-1.23)                      | 0.79 (0.52-1.20)               | 0.80 (0.53-1.21)                      | 0.78 (0.52-1.18)               |
| AJCC stage                                    |                                       |                                |                                       |                                |
| I–II                                          | 1 (referent)                          | 1 (referent)                   | 1 (referent)                          | 1 (referent)                   |
| III                                           | 2.76 (1.95-3.92)                      | 2.68 (1.89-3.81)               | 2.88 (2.03-4.08)                      | 2.88 (2.04-4.09)               |
| IV                                            | 16.9 (11.7-24.5)                      | 16.4 (11.3-23.9)               | 17.6 (12.2-25.6)                      | 17.5 (12.0-25.5)               |
| Tumor grade                                   |                                       |                                |                                       |                                |
| Low-grade (well to moderately differentiated) | 1 (referent)                          | 1 (referent)                   | 1 (referent)                          | 1 (referent)                   |
| High-grade (poorly differentiated)            | 1.91 (1.35-2.70)                      | 1.98 (1.40-2.81)               | 1.81 (1.28-2.57)                      | 1.82 (1.29-2.56)               |
| Lymphovascular invasion                       |                                       |                                |                                       |                                |
| No                                            | 1 (referent)                          | 1 (referent)                   | 1 (referent)                          | 1 (referent)                   |
| Yes                                           | 2.05 (1.55-2.70)                      | 1.98 (1.50-2.61)               | 2.13 (1.61-2.81)                      | 2.06 (1.56-2.72)               |
| MMR status                                    |                                       |                                |                                       |                                |
| MMR proficient                                | 1 (referent)                          | 1 (referent)                   | 1 (referent)                          | 1 (referent)                   |
| MMR deficient                                 | 0.57 (0.32-1.01)                      | 0.63 (0.35-1.13)               | 0.53 (0.30-0.94)                      | 0.51 (0.29-0.91)               |
| <i>BRAF</i> mutation                          |                                       |                                |                                       |                                |
| Wild-type                                     | 1 (referent)                          | 1 (referent)                   | 1 (referent)                          | 1 (referent)                   |
| Mutant                                        | 1.33 (0.84-2.12)                      | 1.34 (0.84-2.13)               | 1.33 (0.83-2.12)                      | 1.32 (0.82-2.12)               |

The densities were divided into ordinal quartile categories from low (Q1) to high (Q4).

Abbreviations: AJCC, American Joint Committee on Cancer; CI, confidence interval; HR, hazard ratio; MMR, mismatch repair.

**Table S4** Univariable and multivariable Cox regression models for cancer-specific and overall survival according to PD-L1<sup>+</sup> and PD-L1<sup>-</sup> macrophage densities in tumor intraepithelial and stromal regions of the tumor center and the invasive margin.

|                                                       | Colorectal cancer-specific survival |               |                         |                           | Overall survival |                         |                           |
|-------------------------------------------------------|-------------------------------------|---------------|-------------------------|---------------------------|------------------|-------------------------|---------------------------|
|                                                       | No. of cases                        | No. of events | Univariable HR (95% CI) | Multivariable HR (95% CI) | No. of events    | Univariable HR (95% CI) | Multivariable HR (95% CI) |
| <b>Tumor center</b>                                   |                                     |               |                         |                           |                  |                         |                           |
| Intraepithelial PD-L1 <sup>+</sup> macrophage density |                                     |               |                         |                           |                  |                         |                           |
| Q1                                                    | 228                                 | 80            | 1 (referent)            | 1 (referent)              | 126              | 1 (referent)            | 1 (referent)              |
| Q2                                                    | 228                                 | 62            | 0.72 (0.52-1.00)        | 0.85 (0.61-1.18)          | 109              | 0.79 (0.61-1.01)        | 0.86 (0.67-1.12)          |
| Q3                                                    | 227                                 | 49            | 0.56 (0.39-0.80)        | 0.66 (0.46-0.94)          | 106              | 0.75 (0.58-0.97)        | 0.78 (0.60-1.01)          |
| Q4                                                    | 227                                 | 51            | 0.60 (0.42-0.85)        | 0.81 (0.55-1.20)          | 108              | 0.78 (0.61-1.01)        | 0.75 (0.56-1.00)          |
| <i>P</i> <sub>trend</sub>                             |                                     |               | 0.0012                  | 0.089                     |                  | 0.059                   | 0.030                     |
| Stromal PD-L1 <sup>+</sup> macrophage density         |                                     |               |                         |                           |                  |                         |                           |
| Q1                                                    | 228                                 | 83            | 1 (referent)            | 1 (referent)              | 134              | 1 (referent)            | 1 (referent)              |
| Q2                                                    | 228                                 | 63            | 0.68 (0.49-0.94)        | 0.88 (0.63-1.22)          | 104              | 0.69 (0.54-0.90)        | 0.82 (0.63-1.07)          |
| Q3                                                    | 227                                 | 56            | 0.60 (0.43-0.84)        | 0.78 (0.55-1.11)          | 107              | 0.69 (0.54-0.89)        | 0.76 (0.58-0.99)          |
| Q4                                                    | 227                                 | 40            | 0.41 (0.28-0.60)        | 0.61 (0.41-0.91)          | 104              | 0.66 (0.51-0.85)        | 0.71 (0.54-0.94)          |
| <i>P</i> <sub>trend</sub>                             |                                     |               | <0.0001                 | 0.013                     |                  | 0.0019                  | 0.012                     |
| Intraepithelial PD-L1 <sup>-</sup> macrophage density |                                     |               |                         |                           |                  |                         |                           |
| Q1                                                    | 228                                 | 59            | 1 (referent)            | 1 (referent)              | 110              | 1 (referent)            | 1 (referent)              |
| Q2                                                    | 228                                 | 64            | 1.11 (0.78-1.58)        | 1.14 (0.80-1.64)          | 112              | 1.03 (0.79-1.34)        | 1.03 (0.79-1.35)          |
| Q3                                                    | 227                                 | 58            | 1.04 (0.72-1.49)        | 0.88 (0.61-1.28)          | 113              | 1.10 (0.85-1.43)        | 0.95 (0.73-1.25)          |
| Q4                                                    | 227                                 | 61            | 1.11 (0.77-1.58)        | 0.95 (0.65-1.41)          | 114              | 1.10 (0.85-1.43)        | 0.84 (0.63-1.11)          |
| <i>P</i> <sub>trend</sub>                             |                                     |               | 0.68                    | 0.51                      |                  | 0.40                    | 0.19                      |
| Stromal PD-L1 <sup>-</sup> macrophage density         |                                     |               |                         |                           |                  |                         |                           |
| Q1                                                    | 228                                 | 54            | 1 (referent)            | 1 (referent)              | 108              | 1 (referent)            | 1 (referent)              |
| Q2                                                    | 228                                 | 64            | 1.19 (0.83-1.70)        | 0.96 (0.66-1.40)          | 110              | 1.03 (0.79-1.35)        | 0.94 (0.71-1.23)          |
| Q3                                                    | 227                                 | 56            | 1.04 (0.72-1.51)        | 0.91 (0.63-1.34)          | 109              | 1.02 (0.78-1.33)        | 0.93 (0.71-1.22)          |
| Q4                                                    | 227                                 | 68            | 1.33 (0.93-1.90)        | 0.97 (0.67-1.39)          | 122              | 1.21 (0.94-1.57)        | 0.98 (0.76-1.28)          |
| <i>P</i> <sub>trend</sub>                             |                                     |               | 0.21                    | 0.81                      |                  | 0.18                    | 0.91                      |
| <b>Invasive margin</b>                                |                                     |               |                         |                           |                  |                         |                           |
| Intraepithelial PD-L1 <sup>+</sup> macrophage density |                                     |               |                         |                           |                  |                         |                           |
| Q1                                                    | 233                                 | 84            | 1 (referent)            | 1 (referent)              | 126              | 1 (referent)            | 1 (referent)              |
| Q2                                                    | 226                                 | 70            | 0.86 (0.63-1.18)        | 1.04 (0.75-1.44)          | 120              | 1.00 (0.78-1.28)        | 1.12 (0.87-1.45)          |
| Q3                                                    | 225                                 | 53            | 0.62 (0.44-0.88)        | 0.85 (0.59-1.20)          | 103              | 0.81 (0.63-1.05)        | 0.96 (0.73-1.25)          |
| Q4                                                    | 226                                 | 35            | 0.39 (0.26-0.58)        | 0.51 (0.33-0.78)          | 100              | 0.73 (0.56-0.95)        | 0.75 (0.56-1.00)          |
| <i>P</i> <sub>trend</sub>                             |                                     |               | <0.0001                 | 0.0030                    |                  | 0.0073                  | 0.044                     |
| Stromal PD-L1 <sup>+</sup> macrophage density         |                                     |               |                         |                           |                  |                         |                           |
| Q1                                                    | 228                                 | 95            | 1 (referent)            | 1 (referent)              | 139              | 1 (referent)            | 1 (referent)              |
| Q2                                                    | 228                                 | 68            | 0.68 (0.50-0.93)        | 0.98 (0.71-1.36)          | 116              | 0.79 (0.61-1.00)        | 1.06 (0.82-1.36)          |
| Q3                                                    | 227                                 | 49            | 0.45 (0.32-0.64)        | 0.74 (0.51-1.06)          | 102              | 0.63 (0.49-0.82)        | 0.84 (0.64-1.11)          |
| Q4                                                    | 227                                 | 30            | 0.27 (0.18-0.40)        | 0.47 (0.30-0.72)          | 92               | 0.54 (0.42-0.71)        | 0.69 (0.52-0.92)          |
| <i>P</i> <sub>trend</sub>                             |                                     |               | <0.0001                 | 0.0005                    |                  | <0.0001                 | 0.0053                    |
| Intraepithelial PD-L1 <sup>-</sup> macrophage density |                                     |               |                         |                           |                  |                         |                           |
| Q1                                                    | 228                                 | 57            | 1 (referent)            | 1 (referent)              | 111              | 1 (referent)            | 1 (referent)              |
| Q2                                                    | 228                                 | 57            | 1.00 (0.69-1.45)        | 1.22 (0.84-1.79)          | 107              | 0.97 (0.74-1.27)        | 1.14 (0.87-1.50)          |
| Q3                                                    | 227                                 | 52            | 0.95 (0.65-1.38)        | 0.98 (0.66-1.44)          | 110              | 1.02 (0.78-1.33)        | 1.09 (0.83-1.44)          |
| Q4                                                    | 227                                 | 76            | 1.43 (1.02-2.02)        | 1.31 (0.92-1.90)          | 121              | 1.18 (0.91-1.52)        | 1.11 (0.85-1.46)          |
| <i>P</i> <sub>trend</sub>                             |                                     |               | 0.054                   | 0.28                      |                  | 0.20                    | 0.52                      |
| Stromal PD-L1 <sup>-</sup> macrophage density         |                                     |               |                         |                           |                  |                         |                           |
| Q1                                                    | 228                                 | 54            | 1 (referent)            | 1 (referent)              | 111              | 1 (referent)            | 1 (referent)              |
| Q2                                                    | 228                                 | 62            | 1.17 (0.81-1.68)        | 1.51 (1.03-2.20)          | 104              | 0.94 (0.72-1.23)        | 1.03 (0.79-1.35)          |
| Q3                                                    | 227                                 | 51            | 0.99 (0.68-1.46)        | 1.42 (0.95-2.11)          | 110              | 1.04 (0.80-1.36)        | 1.23 (0.94-1.61)          |
| Q4                                                    | 227                                 | 75            | 1.47 (1.04-2.09)        | 1.24 (0.87-1.77)          | 124              | 1.18 (0.92-1.53)        | 1.11 (0.86-1.44)          |

---

|                    |       |      |      |      |
|--------------------|-------|------|------|------|
| $P_{\text{trend}}$ | 0.065 | 0.34 | 0.14 | 0.26 |
|--------------------|-------|------|------|------|

---

The densities were divided into ordinal quartile categories from low (Q1) to high (Q4).

Multivariable Cox proportional hazards regression models were adjusted for sex (male, female), age (<65, 65–75, >75), year of operation (2000–2005, 2006–2010, 2011–2015), tumor location (proximal colon, distal colon, rectum), stage (I–II, III, IV), tumor grade (well/moderately differentiated, poorly differentiated), lymphovascular invasion (negative, positive), MMR status (proficient, deficient), and *BRAF* status (wild-type, mutant).

$P_{\text{trend}}$  values were calculated by using the four categories of immune cell densities as continuous variables in univariable and multivariable Cox proportional hazard regression models.

Abbreviations: CI, confidence interval; HR, hazard ratio.

**Table S5** Univariable and multivariable Cox regression models for cancer-specific and overall survival according to PD-L1 expression in tumor cells.

|                | No. of cases | Colorectal cancer-specific survival |                         | Overall survival          |               |                         |                           |
|----------------|--------------|-------------------------------------|-------------------------|---------------------------|---------------|-------------------------|---------------------------|
|                |              | No. of events                       | Univariable HR (95% CI) | Multivariable HR (95% CI) | No. of events | Univariable HR (95% CI) | Multivariable HR (95% CI) |
| PD-L1 negative | 844          | 228                                 | 1 (referent)            | 1 (referent)              | 417           | 1 (referent)            | 1 (referent)              |
| PD-L1 positive | 66           | 14                                  | 0.78 (0.46-1.34)        | 0.93 (0.53-1.64)          | 32            | 0.96 (0.67-1.38)        | 0.83 (0.56-1.22)          |
| <i>P</i>       |              |                                     | 0.37                    | 0.80                      |               | 0.83                    | 0.34                      |

Tumors were categorized into PD-L1 negative or positive using histoscore method with a cut-off >5 for the positivity. Multivariable Cox proportional hazards regression models were adjusted for sex (male, female), age (<65, 65–75, >75), year of operation (2000–2005, 2006–2010, 2011–2015), tumor location (proximal colon, distal colon, rectum), stage (I–II, III, IV), tumor grade (well/moderately differentiated, poorly differentiated), lymphovascular invasion (negative, positive), MMR status (proficient, deficient), and *BRAF* status (wild-type, mutant). Abbreviations: CI, confidence interval; HR, hazard ratio.

**Table S6** Univariable and multivariable Cox regression models for cancer-specific and overall survival according to PD-L1<sup>+</sup> and PD-L1<sup>-</sup> macrophage densities in strata of MMR status.

|                                       | Colorectal cancer-specific survival |               |                         |                           | Overall survival |                         |                           |
|---------------------------------------|-------------------------------------|---------------|-------------------------|---------------------------|------------------|-------------------------|---------------------------|
|                                       | No. of cases                        | No. of events | Univariable HR (95% CI) | Multivariable HR (95% CI) | No. of events    | Univariable HR (95% CI) | Multivariable HR (95% CI) |
| <b>MMR proficient</b>                 |                                     |               |                         |                           |                  |                         |                           |
| PD-L1 <sup>+</sup> macrophage density |                                     |               |                         |                           |                  |                         |                           |
| Low (Q1–Q2)                           | 423                                 | 144           | 1 (referent)            | 1 (referent)              | 227              | 1 (referent)            | 1 (referent)              |
| High (Q3–Q4)                          | 350                                 | 74            | 0.57 (0.43-0.76)        | 0.74 (0.55-0.99)          | 153              | 0.74 (0.60-0.91)        | 0.81 (0.66-1.00)          |
| <i>P</i>                              |                                     |               | 0.0001                  | 0.04                      |                  | 0.0043                  | 0.05                      |
| <b>MMR deficient</b>                  |                                     |               |                         |                           |                  |                         |                           |
| PD-L1 <sup>+</sup> macrophage density |                                     |               |                         |                           |                  |                         |                           |
| Low (Q1–Q2)                           | 33                                  | 10            | 1 (referent)            | 1 (referent)              | 18               | 1 (referent)            | 1 (referent)              |
| High (Q3–Q4)                          | 104                                 | 14            | 0.42 (0.19-0.95)        | 0.36 (0.14-0.93)          | 51               | 0.82 (0.48-1.40)        | 0.67 (0.38-1.19)          |
| <i>P</i>                              |                                     |               | 0.036                   | 0.036                     |                  | 0.46                    | 0.18                      |
| <i>P</i> <sub>interaction</sub>       |                                     |               | 0.45                    | 0.058                     |                  | 0.72                    | 0.38                      |
| <b>MMR proficient</b>                 |                                     |               |                         |                           |                  |                         |                           |
| PD-L1 <sup>-</sup> macrophage density |                                     |               |                         |                           |                  |                         |                           |
| Low (Q1–Q2)                           | 395                                 | 93            | 1 (referent)            | 1 (referent)              | 187              | 1 (referent)            | 1 (referent)              |
| High (Q3–Q4)                          | 378                                 | 125           | 1.46 (1.12-1.91)        | 1.12 (0.85-1.47)          | 193              | 1.13 (0.92-1.38)        | 0.95 (0.77-1.16)          |
| <i>P</i>                              |                                     |               | 0.0057                  | 0.42                      |                  | 0.25                    | 0.59                      |
| <b>MMR deficient</b>                  |                                     |               |                         |                           |                  |                         |                           |
| PD-L1 <sup>-</sup> macrophage density |                                     |               |                         |                           |                  |                         |                           |
| Low (Q1–Q2)                           | 61                                  | 12            | 1 (referent)            | 1 (referent)              | 31               | 1 (referent)            | 1 (referent)              |
| High (Q3–Q4)                          | 76                                  | 12            | 0.80 (0.36-1.79)        | 0.79 (0.33-1.87)          | 38               | 1.03 (0.64-1.66)        | 1.00 (0.61-1.65)          |
| <i>P</i>                              |                                     |               | 0.59                    | 0.59                      |                  | 0.89                    | 1.00                      |
| <i>P</i> <sub>interaction</sub>       |                                     |               | 0.18                    | 0.24                      |                  | 0.71                    | 0.94                      |

The densities were divided into low (Q1–Q2) and high (Q3–Q4) using median as the cut-point.

Multivariable Cox proportional hazards regression models were adjusted for sex (male, female), age (<65, 65–75, >75), year of operation (2000–2005, 2006–2010, 2011–2015), tumor location (proximal colon, distal colon, rectum), stage (I–II, III, IV), tumor grade (well/moderately differentiated, poorly differentiated), lymphovascular invasion (negative, positive), and *BRAF* status (wild-type, mutant).

*P*<sub>interaction</sub> was calculated using the Wald test for the cross product of the immune cell density (low vs high) and MMR status (proficient vs deficient) in the Cox regression model.

Abbreviations: CI, confidence interval; HR, hazard ratio; MMR, mismatch repair

**Table S7** Univariable and multivariable Cox regression models for cancer-specific and overall survival according to PD-L1<sup>+</sup> and PD-L1<sup>-</sup> macrophage densities in strata of AJCC stage.

|                                       | Colorectal cancer-specific survival |               |                         |                           | Overall survival |                         |                           |
|---------------------------------------|-------------------------------------|---------------|-------------------------|---------------------------|------------------|-------------------------|---------------------------|
|                                       | No. of cases                        | No. of events | Univariable HR (95% CI) | Multivariable HR (95% CI) | No. of events    | Univariable HR (95% CI) | Multivariable HR (95% CI) |
| <b>AJCC stage (I)</b>                 |                                     |               |                         |                           |                  |                         |                           |
| PD-L1 <sup>+</sup> macrophage density |                                     |               |                         |                           |                  |                         |                           |
| Low (Q1–Q2)                           | 63                                  | 7             | 1 (referent)            | 1 (referent)              | 22               | 1 (referent)            | 1 (referent)              |
| High (Q3–Q4)                          | 88                                  | 7             | 0.74 (0.26-2.11)        | 1.06 (0.34-3.32)          | 34               | 1.17 (0.68-2.00)        | 1.16 (0.65-2.08)          |
| <i>P</i>                              |                                     |               | 0.57                    | 0.91                      |                  | 0.57                    | 0.61                      |
| <b>AJCC stage (II)</b>                |                                     |               |                         |                           |                  |                         |                           |
| PD-L1 <sup>+</sup> macrophage density |                                     |               |                         |                           |                  |                         |                           |
| Low (Q1–Q2)                           | 141                                 | 24            | 1 (referent)            | 1 (referent)              | 61               | 1 (referent)            | 1 (referent)              |
| High (Q3–Q4)                          | 201                                 | 16            | 0.44 (0.23-0.83)        | 0.43 (0.22-0.84)          | 76               | 0.80 (0.57-1.12)        | 0.78 (0.54-1.11)          |
| <i>P</i>                              |                                     |               | 0.011                   | 0.014                     |                  | 0.20                    | 0.17                      |
| <b>AJCC stage (III)</b>               |                                     |               |                         |                           |                  |                         |                           |
| PD-L1 <sup>+</sup> macrophage density |                                     |               |                         |                           |                  |                         |                           |
| Low (Q1–Q2)                           | 175                                 | 59            | 1 (referent)            | 1 (referent)              | 91               | 1 (referent)            | 1 (referent)              |
| High (Q3–Q4)                          | 126                                 | 35            | 0.85 (0.56-1.29)        | 0.89 (0.56-1.39)          | 58               | 0.91 (0.66-1.27)        | 0.85 (0.59-1.21)          |
| <i>P</i>                              |                                     |               | 0.44                    | 0.60                      |                  | 0.59                    | 0.36                      |
| <b>AJCC stage (IV)</b>                |                                     |               |                         |                           |                  |                         |                           |
| PD-L1 <sup>+</sup> macrophage density |                                     |               |                         |                           |                  |                         |                           |
| Low (Q1–Q2)                           | 77                                  | 64            | 1 (referent)            | 1 (referent)              | 71               | 1 (referent)            | 1 (referent)              |
| High (Q3–Q4)                          | 39                                  | 30            | 0.87 (0.56-1.34)        | 0.67 (0.41-1.10)          | 36               | 0.93 (0.62-1.38)        | 0.68 (0.43-1.07)          |
| <i>P</i>                              |                                     |               | 0.53                    | 0.11                      |                  | 0.71                    | 0.09                      |
| <b>AJCC stage (I)</b>                 |                                     |               |                         |                           |                  |                         |                           |
| PD-L1 <sup>-</sup> macrophage density |                                     |               |                         |                           |                  |                         |                           |
| Low (Q1–Q2)                           | 88                                  | 6             | 1 (referent)            | 1 (referent)              | 31               | 1 (referent)            | 1 (referent)              |
| High (Q3–Q4)                          | 63                                  | 8             | 1.86 (0.65-5.37)        | 2.20 (0.65-7.49)          | 25               | 0.12 (0.66-1.90)        | 0.89 (0.51-1.56)          |
| <i>P</i>                              |                                     |               | 0.25                    | 0.21                      |                  | 0.67                    | 0.69                      |
| <b>AJCC stage (II)</b>                |                                     |               |                         |                           |                  |                         |                           |
| PD-L1 <sup>-</sup> macrophage density |                                     |               |                         |                           |                  |                         |                           |
| Low (Q1–Q2)                           | 179                                 | 20            | 1 (referent)            | 1 (referent)              | 71               | 1 (referent)            | 1 (referent)              |
| High (Q3–Q4)                          | 163                                 | 20            | 1.11 (0.60-2.06)        | 1.08 (0.57-2.06)          | 66               | 1.03 (0.74-1.44)        | 1.07 (0.76-1.50)          |
| <i>P</i>                              |                                     |               | 0.75                    | 0.81                      |                  | 0.86                    | 0.71                      |
| <b>AJCC stage (III)</b>               |                                     |               |                         |                           |                  |                         |                           |
| PD-L1 <sup>-</sup> macrophage density |                                     |               |                         |                           |                  |                         |                           |
| Low (Q1–Q2)                           | 141                                 | 41            | 1 (referent)            | 1 (referent)              | 71               | 1 (referent)            | 1 (referent)              |
| High (Q3–Q4)                          | 160                                 | 53            | 1.16 (0.77-1.74)        | 1.14 (0.75-1.72)          | 78               | 0.99 (0.71-1.36)        | 0.96 (0.70-1.33)          |
| <i>P</i>                              |                                     |               | 0.48                    | 0.54                      |                  | 0.93                    | 0.82                      |
| <b>AJCC stage (IV)</b>                |                                     |               |                         |                           |                  |                         |                           |
| PD-L1 <sup>-</sup> macrophage density |                                     |               |                         |                           |                  |                         |                           |
| Low (Q1–Q2)                           | 48                                  | 38            | 1 (referent)            | 1 (referent)              | 45               | 1 (referent)            | 1 (referent)              |
| High (Q3–Q4)                          | 68                                  | 56            | 0.92 (0.61-1.38)        | 0.83 (0.53-1.30)          | 62               | 0.87 (0.59-1.28)        | 0.77 (0.50-1.17)          |
| <i>P</i>                              |                                     |               | 0.68                    | 0.42                      |                  | 0.49                    | 0.22                      |

The densities were divided into low (Q1–Q2) and high (Q3–Q4) using median as the cut-point.

Multivariable Cox proportional hazards regression models were adjusted for sex (male, female), age (<65, 65–75, >75), year of operation (2000–2005, 2006–2010, 2011–2015), tumor location (proximal colon, distal colon, rectum), tumor grade (well/moderately differentiated, poorly differentiated), lymphovascular invasion (negative, positive), MMR status (proficient, deficient), and *BRAF* status (wild-type, mutant).

Abbreviations: AJCC, American Joint Committee on Cancer; CI, confidence interval; HR, hazard ratio.



**Table S8** Univariable and multivariable Cox regression models for cancer-specific and overall survival according to PD-L1<sup>+</sup> and PD-L1<sup>-</sup> macrophage density in strata of AJCC stage.

|                                       | Colorectal cancer-specific survival |               |                         |                           | Overall survival |                         |                           |
|---------------------------------------|-------------------------------------|---------------|-------------------------|---------------------------|------------------|-------------------------|---------------------------|
|                                       | No. of cases                        | No. of events | Univariable HR (95% CI) | Multivariable HR (95% CI) | No. of events    | Univariable HR (95% CI) | Multivariable HR (95% CI) |
| <b>Low AJCC stage (I–III)</b>         |                                     |               |                         |                           |                  |                         |                           |
| PD-L1 <sup>+</sup> macrophage density |                                     |               |                         |                           |                  |                         |                           |
| Low (Q1–Q2)                           | 379                                 | 90            | 1 (referent)            | 1 (referent)              | 174              | 1 (referent)            | 1 (referent)              |
| High (Q3–Q4)                          | 415                                 | 58            | 0.57 (0.41-0.79)        | 0.63 (0.45-0.90)          | 168              | 0.85 (0.68-1.05)        | 0.80 (0.64-1.00)          |
| <i>P</i>                              |                                     |               | 0.0008                  | 0.010                     |                  | 0.12                    | 0.058                     |
| <b>High AJCC stage (IV)</b>           |                                     |               |                         |                           |                  |                         |                           |
| PD-L1 <sup>+</sup> macrophage density |                                     |               |                         |                           |                  |                         |                           |
| Low (Q1–Q2)                           | 77                                  | 64            | 1 (referent)            | 1 (referent)              | 71               | 1 (referent)            | 1 (referent)              |
| High (Q3–Q4)                          | 39                                  | 30            | 0.87 (0.56-1.34)        | 0.67 (0.41-1.10)          | 36               | 0.93 (0.62-1.38)        | 0.68 (0.43-1.07)          |
| <i>P</i>                              |                                     |               | 0.53                    | 0.11                      |                  | 0.71                    | 0.094                     |
| <i>P</i> <sub>interaction</sub>       |                                     |               | 0.13                    | 0.57                      |                  | 0.73                    | 0.65                      |
| <b>Low AJCC stage (I–III)</b>         |                                     |               |                         |                           |                  |                         |                           |
| PD-L1 <sup>-</sup> macrophage density |                                     |               |                         |                           |                  |                         |                           |
| Low (Q1–Q2)                           | 408                                 | 67            | 1 (referent)            | 1 (referent)              | 173              | 1 (referent)            | 1 (referent)              |
| High (Q3–Q4)                          | 386                                 | 81            | 1.31 (0.95-1.81)        | 1.26 (0.91-1.75)          | 169              | 1.06 (0.85-1.31)        | 1.00 (0.81-1.24)          |
| <i>P</i>                              |                                     |               | 0.11                    | 0.16                      |                  | 0.62                    | 0.97                      |
| <b>High AJCC stage (IV)</b>           |                                     |               |                         |                           |                  |                         |                           |
| PD-L1 <sup>-</sup> macrophage density |                                     |               |                         |                           |                  |                         |                           |
| Low (Q1–Q2)                           | 48                                  | 38            | 1 (referent)            | 1 (referent)              | 45               | 1 (referent)            | 1 (referent)              |
| High (Q3–Q4)                          | 68                                  | 56            | 0.92 (0.61-1.38)        | 0.83 (0.53-1.30)          | 62               | 0.87 (0.59-1.28)        | 0.77 (0.50-1.17)          |
| <i>P</i>                              |                                     |               | 0.68                    | 0.42                      |                  | 0.49                    | 0.22                      |
| <i>P</i> <sub>interaction</sub>       |                                     |               | 0.19                    | 0.16                      |                  | 0.45                    | 0.62                      |

The densities were divided into low (Q1–Q2) and high (Q3–Q4) using median as the cut-point.

Multivariable Cox proportional hazards regression models were adjusted for sex (male, female), age (<65, 65–75, >75), year of operation (2000–2005, 2006–2010, 2011–2015), tumor location (proximal colon, distal colon, rectum), tumor grade (well/moderately differentiated, poorly differentiated), lymphovascular invasion (negative, positive), MMR status (proficient, deficient), and *BRAF* status (wild-type, mutant).

*P*<sub>interaction</sub> was calculated using the Wald test for the cross product of the immune cell density (low vs high) and AJCC stage (I–III vs IV) in the Cox regression model.

Abbreviations: AJCC, American Joint Committee on Cancer; CI, confidence interval; HR, hazard ratio.

**Table S9** Multivariable Cox regression models for cancer-specific survival according to PD-1<sup>+</sup> and PD-1<sup>-</sup> T densities in the tumor center and the invasive margin with all variables.

|                                               | PD-1 <sup>+</sup> T cell density |                  | PD-1 <sup>-</sup> T cell density |                  |
|-----------------------------------------------|----------------------------------|------------------|----------------------------------|------------------|
|                                               | Tumor center                     | Invasive margin  | Tumor center                     | Invasive margin  |
|                                               | HR (95% CI)                      | HR (95% CI)      | HR (95% CI)                      | HR (95% CI)      |
| PD-1 <sup>+</sup> T cell density              |                                  |                  | Not included                     | Not included     |
| Q1                                            | 1 (referent)                     | 1 (referent)     |                                  |                  |
| Q2                                            | 0.82 (0.58-1.16)                 | 0.81 (0.58-1.14) |                                  |                  |
| Q3                                            | 0.75 (0.54-1.04)                 | 0.83 (0.58-1.17) |                                  |                  |
| Q4                                            | 0.46 (0.30-0.71)                 | 0.52 (0.34-0.79) |                                  |                  |
| PD-1 <sup>-</sup> T cell density              | Not included                     | Not included     |                                  |                  |
| Q1                                            |                                  |                  | 1 (referent)                     | 1 (referent)     |
| Q2                                            |                                  |                  | 0.68 (0.48-0.96)                 | 0.80 (0.58-1.12) |
| Q3                                            |                                  |                  | 0.67 (0.48-0.94)                 | 0.62 (0.43-0.90) |
| Q4                                            |                                  |                  | 0.48 (0.32-0.70)                 | 0.61 (0.42-0.88) |
| Age                                           |                                  |                  |                                  |                  |
| <65                                           | 1 (referent)                     | 1 (referent)     | 1 (referent)                     | 1 (referent)     |
| 65–75                                         | 1.13 (0.82-1.57)                 | 1.14 (0.83-1.58) | 1.16 (0.84-1.60)                 | 1.18 (0.85-1.63) |
| >75                                           | 1.92 (1.38-2.67)                 | 1.91 (1.38-2.65) | 1.97 (1.42-2.73)                 | 1.92 (1.39-2.66) |
| Sex                                           |                                  |                  |                                  |                  |
| Male                                          | 1 (referent)                     | 1 (referent)     | 1 (referent)                     | 1 (referent)     |
| Female                                        | 0.88 (0.67-1.15)                 | 0.86 (0.66-1.12) | 0.88 (0.67-1.15)                 | 0.90 (0.68-1.17) |
| Year of operation                             |                                  |                  |                                  |                  |
| 2000–2005                                     | 1 (referent)                     | 1 (referent)     | 1 (referent)                     | 1 (referent)     |
| 2006–2010                                     | 0.62 (0.45-0.85)                 | 0.60 (0.44-0.82) | 0.60 (0.44-0.82)                 | 0.61 (0.45-0.83) |
| 2011–2015                                     | 0.48 (0.34-0.66)                 | 0.45 (0.32-0.66) | 0.45 (0.32-0.62)                 | 0.45 (0.32-0.62) |
| Tumor location                                |                                  |                  |                                  |                  |
| Proximal colon                                | 1 (referent)                     | 1 (referent)     | 1 (referent)                     | 1 (referent)     |
| Distal colon                                  | 0.96 (0.72-1.29)                 | 0.94 (0.70-1.26) | 0.94 (0.70-1.26)                 | 0.95 (0.71-1.26) |
| Rectum                                        | 0.81 (0.54-1.23)                 | 0.81 (0.54-1.23) | 0.82 (0.55-1.26)                 | 0.80 (0.53-1.22) |
| AJCC stage                                    |                                  |                  |                                  |                  |
| I–II                                          | 1 (referent)                     | 1 (referent)     | 1 (referent)                     | 1 (referent)     |
| III                                           | 2.68 (1.89-3.81)                 | 2.70 (1.90-3.84) | 2.81 (1.98-3.99)                 | 2.79 (1.97-3.95) |
| IV                                            | 16.3 (11.2-23.7)                 | 15.7 (10.8-22.9) | 16.8 (11.6-24.5)                 | 16.0 (11.0-23.2) |
| Tumor grade                                   |                                  |                  |                                  |                  |
| Low-grade (well to moderately differentiated) | 1 (referent)                     | 1 (referent)     | 1 (referent)                     | 1 (referent)     |
| High-grade (poorly differentiated)            | 1.95 (1.38-2.76)                 | 1.99 (1.40-2.82) | 1.96 (1.39-2.77)                 | 1.88 (1.33-2.66) |
| Lymphovascular invasion                       |                                  |                  |                                  |                  |
| No                                            | 1 (referent)                     | 1 (referent)     | 1 (referent)                     | 1 (referent)     |
| Yes                                           | 1.95 (1.47-2.57)                 | 2.01 (1.52-2.65) | 2.01 (1.52-2.66)                 | 2.03 (1.54-2.68) |
| MMR status                                    |                                  |                  |                                  |                  |
| MMR proficient                                | 1 (referent)                     | 1 (referent)     | 1 (referent)                     | 1 (referent)     |
| MMR deficient                                 | 0.59 (0.34-1.04)                 | 1.58 (0.33-1.02) | 0.56 (0.32-0.98)                 | 0.54 (0.30-0.96) |
| <i>BRAF</i> mutation                          |                                  |                  |                                  |                  |
| Wild-type                                     | 1 (referent)                     | 1 (referent)     | 1 (referent)                     | 1 (referent)     |
| Mutant                                        | 1.29 (0.82-2.06)                 | 1.31 (0.82-2.09) | 1.23 (0.78-1.95)                 | 1.34 (0.84-2.15) |

The densities were divided into ordinal quartile categories from low (Q1) to high (Q4).

Abbreviations: AJCC, American Joint Committee on Cancer; CI, confidence interval; HR, hazard ratio; MMR, mismatch repair.

**Table S10** Univariable and multivariable Cox regression models for cancer-specific and overall survival according to PD-1<sup>+</sup> T cell densities in strata of PD-L1<sup>+</sup> macrophage densities.

|                                                          | Colorectal cancer-specific survival |               |                         |                           | Overall survival |                         |                           |
|----------------------------------------------------------|-------------------------------------|---------------|-------------------------|---------------------------|------------------|-------------------------|---------------------------|
|                                                          | No. of cases                        | No. of events | Univariable HR (95% CI) | Multivariable HR (95% CI) | No. of events    | Univariable HR (95% CI) | Multivariable HR (95% CI) |
| <b>PD-L1<sup>+</sup> macrophage density low (Q1–Q2)</b>  |                                     |               |                         |                           |                  |                         |                           |
| PD-1 <sup>+</sup> T cell density                         |                                     |               |                         |                           |                  |                         |                           |
| Low (Q1–Q2)                                              | 337                                 | 122           | 1 (referent)            | 1 (referent)              | 197              | 1 (referent)            | 1 (referent)              |
| High (Q3–Q4)                                             | 118                                 | 36            | 0.83 (0.58-1.21)        | 0.94 (0.63-1.40)          | 60               | 0.86 (0.64-1.15)        | 0.89 (0.66-1.21)          |
| <i>P</i>                                                 |                                     |               | 0.34                    | 0.75                      |                  | 0.31                    | 0.45                      |
| <b>PD-L1<sup>+</sup> macrophage density high (Q3–Q4)</b> |                                     |               |                         |                           |                  |                         |                           |
| PD-1 <sup>+</sup> T cell density                         |                                     |               |                         |                           |                  |                         |                           |
| Low (Q1–Q2)                                              | 118                                 | 32            | 1 (referent)            | 1 (referent)              | 48               | 1 (referent)            | 1 (referent)              |
| High (Q3–Q4)                                             | 337                                 | 52            | 0.55 (0.36-0.86)        | 0.72 (0.43-1.19)          | 144              | 0.99 (0.71-1.37)        | 0.99 (0.69-1.40)          |
| <i>P</i>                                                 |                                     |               | 0.0082                  | 0.20                      |                  | 0.94                    | 0.94                      |
| <i>P</i> <sub>interaction</sub>                          |                                     |               | 0.16                    | 0.13                      |                  | 0.51                    | 0.86                      |

The densities of PD-1<sup>+</sup> T cells and PD-L1<sup>+</sup> macrophages were divided into low (Q1–Q2) and high (Q3–Q4) using median as the cut-point.

Multivariable Cox proportional hazards regression models were adjusted for sex (male, female), age (<65, 65–75, >75), year of operation (2000–2005, 2006–2010, 2011–2015), tumor location (proximal colon, distal colon, rectum), stage (I–II, III, IV), tumor grade (well/moderately differentiated, poorly differentiated), lymphovascular invasion (negative, positive), MMR status (proficient, deficient), and *BRAF* status (wild-type, mutant).

*P*<sub>interaction</sub> was calculated using the Wald test for the cross product of the macrophage density (low vs high) and T cell density (low vs high) in the Cox regression model.

Abbreviations: CI, confidence interval; HR, hazard ratio.

**Table S11** Univariable and multivariable Cox regression models for cancer-specific and overall survival according PD-1<sup>+</sup> T cell densities in strata of PD-L1 expression in tumor cells.

|                                  | Colorectal cancer-specific survival |               |                         |                           | Overall survival |                         |                           |
|----------------------------------|-------------------------------------|---------------|-------------------------|---------------------------|------------------|-------------------------|---------------------------|
|                                  | No. of cases                        | No. of events | Univariable HR (95% CI) | Multivariable HR (95% CI) | No. of events    | Univariable HR (95% CI) | Multivariable HR (95% CI) |
| <b>Tumor cell PD-L1 positive</b> |                                     |               |                         |                           |                  |                         |                           |
| PD-1 <sup>+</sup> T cell density |                                     |               |                         |                           |                  |                         |                           |
| Low (Q1–Q2)                      | 5                                   | 2             | 1 (referent)            | 1 (referent)              | 2                | 1 (referent)            | 1 (referent)              |
| High (Q3–Q4)                     | 61                                  | 12            | 0.48 (0.11-2.14)        | 0.25 (0.02-3.28)          | 30               | 1.12 (0.27-4.68)        | 0.88 (0.17-4.52)          |
| <i>P</i>                         |                                     |               | 0.34                    | 0.29                      |                  | 0.88                    | 0.87                      |
| <b>Tumor cell PD-L1 negative</b> |                                     |               |                         |                           |                  |                         |                           |
| PD-1 <sup>+</sup> T cell density |                                     |               |                         |                           |                  |                         |                           |
| Low (Q1–Q2)                      | 450                                 | 152           | 1 (referent)            | 1 (referent)              | 243              | 1 (referent)            | 1 (referent)              |
| High (Q3–Q4)                     | 394                                 | 76            | 0.53 (0.40-0.69)        | 0.67 (0.50-0.90)          | 174              | 0.74 (0.61-0.90)        | 0.79 (0.64-0.97)          |
| <i>P</i>                         |                                     |               | <0.0001                 | 0.0071                    |                  | 0.0026                  | 0.0023                    |
| <i>P</i> <sub>interaction</sub>  |                                     |               | 0.83                    | 0.55                      |                  | 0.57                    | 0.75                      |

The densities of PD-1<sup>+</sup> T cells were divided into low (Q1–Q2) and high (Q3–Q4) using median as the cut-point. Histoscore  $\geq 5$  was used as cut-off for PD-L1 positivity in tumors.

Multivariable Cox proportional hazards regression models were adjusted for sex (male, female), age (<65, 65–75, >75), year of operation (2000–2005, 2006–2010, 2011–2015), tumor location (proximal colon, distal colon, rectum), stage (I–II, III, IV), tumor grade (well/moderately differentiated, poorly differentiated), lymphovascular invasion (negative, positive), MMR status (proficient, deficient), and *BRAF* status (wild-type, mutant).

*P*<sub>interaction</sub> was calculated using the Wald test for the cross product of the PD-L1 expression in tumor cells (negative vs positive) and T cell density (low vs high) in the Cox regression model.

Abbreviations: CI, confidence interval; HR, hazard ratio.

**Table S12** Univariable and multivariable Cox regression models for cancer-specific and overall survival according to the densities of M1-like and M2-like macrophages and their density ratio in the tumor center and the invasive margin.

|                                     | Colorectal cancer-specific survival |               |                         |                           | Overall survival |                         |                           |
|-------------------------------------|-------------------------------------|---------------|-------------------------|---------------------------|------------------|-------------------------|---------------------------|
|                                     | No. of cases                        | No. of events | Univariable HR (95% CI) | Multivariable HR (95% CI) | No. of events    | Univariable HR (95% CI) | Multivariable HR (95% CI) |
| <b>Tumor center</b>                 |                                     |               |                         |                           |                  |                         |                           |
| M1-like macrophage density          |                                     |               |                         |                           |                  |                         |                           |
| Q1                                  | 228                                 | 85            | 1 (referent)            | 1 (referent)              | 137              | 1 (referent)            | 1 (referent)              |
| Q2                                  | 228                                 | 55            | 0.54 (0.38-0.75)        | 0.59 (0.42-0.83)          | 102              | 0.61 (0.47-0.79)        | 0.69 (0.54-0.90)          |
| Q3                                  | 227                                 | 53            | 0.50 (0.36-0.71)        | 0.55 (0.38-0.77)          | 105              | 0.62 (0.48-0.81)        | 0.62 (0.45-0.80)          |
| Q4                                  | 227                                 | 49            | 0.50 (0.35-0.71)        | 0.54 (0.38-0.78)          | 105              | 0.64 (0.50-0.83)        | 0.66 (0.51-0.86)          |
| <i>P</i> <sub>trend</sub>           |                                     |               | <0.0001                 | 0.0004                    |                  | 0.0013                  | 0.0007                    |
| M2-like macrophage density          |                                     |               |                         |                           |                  |                         |                           |
| Q1                                  | 228                                 | 48            | 1 (referent)            | 1 (referent)              | 99               | 1 (referent)            | 1 (referent)              |
| Q2                                  | 228                                 | 58            | 1.27 (0.86-1.86)        | 0.83 (0.56-1.23)          | 112              | 1.28 (0.98-1.68)        | 0.97 (0.74-1.28)          |
| Q3                                  | 227                                 | 64            | 1.44 (0.99-2.09)        | 1.03 (0.70-1.51)          | 107              | 1.21 (0.92-1.60)        | 1.03 (0.78-1.36)          |
| Q4                                  | 227                                 | 72            | 1.69 (1.18-2.44)        | 1.10 (0.75-1.60)          | 131              | 1.59 (1.22-2.06)        | 1.13 (0.78-1.36)          |
| <i>P</i> <sub>trend</sub>           |                                     |               | 0.003                   | 0.31                      |                  | 0.0014                  | 0.29                      |
| M1:M2-like macrophage density ratio |                                     |               |                         |                           |                  |                         |                           |
| Q1                                  | 228                                 | 83            | 1 (referent)            | 1 (referent)              | 141              | 1 (referent)            | 1 (referent)              |
| Q2                                  | 228                                 | 55            | 0.60 (0.43-0.84)        | 0.61 (0.43-0.86)          | 98               | 0.60 (0.46-0.78)        | 0.60 (0.46-0.78)          |
| Q3                                  | 227                                 | 64            | 0.71 (0.51-0.98)        | 0.86 (0.62-1.20)          | 114              | 0.73 (0.57-0.94)        | 0.87 (0.68-1.12)          |
| Q4                                  | 227                                 | 40            | 0.40 (0.27-0.58)        | 0.59 (0.40-0.87)          | 96               | 0.54 (0.41-0.69)        | 0.69 (0.53-0.91)          |
| <i>P</i> <sub>trend</sub>           |                                     |               | <0.0001                 | 0.040                     |                  | <0.0001                 | 0.069                     |
| <b>Invasive margin</b>              |                                     |               |                         |                           |                  |                         |                           |
| M1-like macrophage density          |                                     |               |                         |                           |                  |                         |                           |
| Q1                                  | 228                                 | 87            | 1 (referent)            | 1 (referent)              | 143              | 1 (referent)            | 1 (referent)              |
| Q2                                  | 228                                 | 48            | 0.48 (0.34-0.69)        | 0.63 (0.44-0.91)          | 109              | 0.65 (0.51-0.84)        | 0.73 (0.57-0.94)          |
| Q3                                  | 227                                 | 60            | 0.61 (0.44-0.84)        | 0.78 (0.56-1.10)          | 102              | 0.61 (0.47-0.79)        | 0.68 (0.53-0.88)          |
| Q4                                  | 227                                 | 47            | 0.46 (0.32-0.65)        | 0.60 (0.41-0.86)          | 95               | 0.54 (0.42-0.70)        | 0.63 (0.49-0.83)          |
| <i>P</i> <sub>trend</sub>           |                                     |               | <0.0001                 | 0.014                     |                  | <0.0001                 | 0.0006                    |
| M2-like macrophage density          |                                     |               |                         |                           |                  |                         |                           |
| Q1                                  | 228                                 | 57            | 1 (referent)            | 1 (referent)              | 101              | 1 (referent)            | 1 (referent)              |
| Q2                                  | 228                                 | 55            | 0.98 (0.67-1.42)        | 1.07 (0.73-1.57)          | 109              | 1.13 (0.86-1.47)        | 1.17 (0.89-1.54)          |
| Q3                                  | 227                                 | 52            | 0.99 (0.68-1.44)        | 1.03 (0.70-1.50)          | 108              | 1.14 (0.87-1.49)        | 1.21 (0.92-1.59)          |
| Q4                                  | 227                                 | 78            | 1.49 (1.06-2.10)        | 1.14 (0.80-1.63)          | 131              | 1.47 (1.13-1.90)        | 1.22 (0.93-1.60)          |
| <i>P</i> <sub>trend</sub>           |                                     |               | 0.024                   | 0.53                      |                  | 0.0051                  | 0.15                      |
| M1:M2-like macrophage density ratio |                                     |               |                         |                           |                  |                         |                           |
| Q1                                  | 228                                 | 78            | 1 (referent)            | 1 (referent)              | 137              | 1 (referent)            | 1 (referent)              |
| Q2                                  | 228                                 | 65            | 0.80 (0.58-1.11)        | 0.78 (0.56-1.10)          | 113              | 0.79 (0.62-1.01)        | 0.79 (0.61-1.01)          |
| Q3                                  | 227                                 | 47            | 0.55 (0.38-0.78)        | 0.75 (0.52-1.09)          | 102              | 0.66 (0.51-0.86)        | 0.79 (0.61-1.03)          |
| Q4                                  | 227                                 | 52            | 0.59 (0.42-0.84)        | 0.73 (0.51-1.05)          | 96               | 0.60 (0.47-0.79)        | 0.68 (0.52-0.89)          |
| <i>P</i> <sub>trend</sub>           |                                     |               | 0.0005                  | 0.081                     |                  | <0.0001                 | 0.0074                    |

The densities were divided into ordinal quartile categories from low (Q1) to high (Q4).

Multivariable Cox proportional hazards regression models were adjusted for sex (male, female), age (<65, 65–75, >75), year of operation (2000–2005, 2006–2010, 2011–2015), tumor location (proximal colon, distal colon, rectum), stage (I–II, III, IV), tumor grade (well/moderately differentiated, poorly differentiated), lymphovascular invasion (negative, positive), MMR status (proficient, deficient), and *BRAF* status (wild-type, mutant).

*P*<sub>trend</sub> values were calculated by using the four categories of immune cell densities as continuous variables in univariable and multivariable Cox proportional hazard regression models.

Abbreviations: CI, confidence interval; HR, hazard ratio.

**Table S13** Univariable and multivariable Cox regression models for cancer-specific survival for the densities of macrophage subtypes categorized according to the PD-L1 expression and M1/M2 polarization state in the tumor center and the invasive margin.

|                                   | PD-L1+ macrophage density |               |                         |                           | PD-L1- macrophage density |                         |                           |
|-----------------------------------|---------------------------|---------------|-------------------------|---------------------------|---------------------------|-------------------------|---------------------------|
|                                   | No. of cases              | No. of events | Univariable HR (95% CI) | Multivariable HR (95% CI) | No. of events             | Univariable HR (95% CI) | Multivariable HR (95% CI) |
| <b>Tumor center</b>               |                           |               |                         |                           |                           |                         |                           |
| M1-like macrophages               |                           |               |                         |                           |                           |                         |                           |
| Q1                                | 228                       | 86            | 1 (referent)            | 1 (referent)              | 81                        | 1 (referent)            | 1 (referent)              |
| Q2                                | 228                       | 70            | 0.73 (0.53-1.00)        | 0.94 (0.68-1.30)          | 48                        | 0.52 (0.36-0.74)        | 0.54 (0.38-0.78)          |
| Q3                                | 227                       | 446           | 0.45 (0.32-0.65)        | 0.58 (0.40-0.83)          | 62                        | 0.67 (0.48-0.93)        | 0.67 (0.48-0.94)          |
| Q4                                | 227                       | 40            | 0.40 (0.27-0.58)        | 0.57 (0.39-0.85)          | 51                        | 0.55 (0.38-0.78)        | 0.60 (0.42-0.86)          |
| <i>P</i> <sub>trend</sub>         |                           |               | <0.0001                 | 0.0005                    |                           | 0.0034                  | 0.011                     |
| M2-like macrophages               |                           |               |                         |                           |                           |                         |                           |
| Q1                                | 340                       | 104           | 1 (referent)            | 1 (referent)              | 48                        | 1 (referent)            | 1 (referent)              |
| Q2                                | 190                       | 49            | 0.85 (0.60-1.19)        | 0.99 (0.70-1.40)          | 50                        | 1.10 (0.74-1.63)        | 0.75 (0.50-1.13)          |
| Q3                                | 190                       | 47            | 0.77 (0.54-1.08)        | 0.85 (0.59-1.20)          | 67                        | 1.59 (1.10-2.30)        | 1.01 (0.69-1.49)          |
| Q4                                | 190                       | 42            | 0.69 (0.48-0.98)        | 0.81 (0.56-1.18)          | 77                        | 1.84 (1.28-2.64)        | 1.17 (0.81-1.71)          |
| <i>P</i> <sub>trend</sub>         |                           |               | 0.025                   | 0.21                      |                           | 0.0001                  | 0.11                      |
| M1/M2 mixed phenotype macrophages |                           |               |                         |                           |                           |                         |                           |
| Q1                                | 228                       | 78            | 1 (referent)            | 1 (referent)              | 59                        | 1 (referent)            | 1 (referent)              |
| Q2                                | 228                       | 66            | 0.82 (0.59-1.13)        | 0.74 (0.52-1.03)          | 51                        | 0.83 (0.57-1.21)        | 0.75 (0.51-1.10)          |
| Q3                                | 227                       | 57            | 0.68 (0.49-0.96)        | 0.95 (0.67-1.35)          | 60                        | 1.03 (0.72-1.47)        | 0.75 (0.52-1.09)          |
| Q4                                | 227                       | 41            | 0.47 (0.32-0.68)        | 0.55 (0.37-0.82)          | 72                        | 1.27 (0.90-1.80)        | 0.93 (0.65-1.32)          |
| <i>P</i> <sub>trend</sub>         |                           |               | <0.0001                 | 0.017                     |                           | 0.089                   | 0.79                      |
| <b>Invasive margin</b>            |                           |               |                         |                           |                           |                         |                           |
| M1-like macrophages               |                           |               |                         |                           |                           |                         |                           |
| Q1                                | 228                       | 93            | 1 (referent)            | 1 (referent)              | 76                        | 1 (referent)            | 1 (referent)              |
| Q2                                | 228                       | 69            | 0.72 (0.53-0.99)        | 1.07 (0.77-1.49)          | 50                        | 0.59 (0.41-0.84)        | 0.57 (0.39-0.83)          |
| Q3                                | 227                       | 50            | 0.48 (0.34-0.68)        | 0.69 (0.48-0.99)          | 53                        | 0.60 (0.43-0.86)        | 0.82 (0.57-1.16)          |
| Q4                                | 227                       | 30            | 0.27 (0.18-0.41)        | 0.51 (0.33-0.79)          | 63                        | 0.76 (0.54-1.06)        | 0.72 (0.51-1.02)          |
| <i>P</i> <sub>trend</sub>         |                           |               | <0.0001                 | 0.0008                    |                           | 0.12                    | 0.20                      |
| M2-like macrophages               |                           |               |                         |                           |                           |                         |                           |
| Q1                                | 259                       | 82            | 1 (referent)            | 1 (referent)              | 55                        | 1 (referent)            | 1 (referent)              |
| Q2                                | 217                       | 65            | 0.91 (0.66-1.26)        | 1.17 (0.84-1.64)          | 52                        | 0.99 (0.68-1.44)        | 1.11 (0.75-1.64)          |
| Q3                                | 217                       | 55            | 0.82 (0.58-1.15)        | 0.97 (0.69-1.38)          | 54                        | 1.05 (0.72-1.53)        | 1.09 (0.74-1.60)          |
| Q4                                | 217                       | 40            | 0.54 (0.37-0.78)        | 0.68 (0.46-1.01)          | 81                        | 1.65 (1.17-2.32)        | 1.18 (0.83-1.68)          |
| <i>P</i> <sub>trend</sub>         |                           |               | 0.0013                  | 0.068                     |                           | 0.0036                  | 0.40                      |
| M1/M2 mixed phenotype macrophages |                           |               |                         |                           |                           |                         |                           |
| Q1                                | 228                       | 89            | 1 (referent)            | 1 (referent)              | 58                        | 1 (referent)            | 1 (referent)              |
| Q2                                | 228                       | 70            | 0.77 (0.56-1.05)        | 1.13 (0.82-1.56)          | 56                        | 0.96 (0.67-1.39)        | 1.07 (0.73-1.56)          |
| Q3                                | 227                       | 46            | 0.47 (0.33-0.68)        | 0.74 (0.51-1.07)          | 54                        | 0.93 (0.64-1.35)        | 1.09 (0.75-1.60)          |
| Q4                                | 227                       | 37            | 0.37 (0.25-0.54)        | 0.57 (0.38-0.86)          | 74                        | 1.29 (0.92-1.82)        | 1.07 (0.76-1.52)          |
| <i>P</i> <sub>trend</sub>         |                           |               | <0.0001                 | 0.0029                    |                           | 0.16                    | 0.70                      |

The densities were divided into ordinal categories from low (Q1) to high (Q4).

Multivariable Cox proportional hazards regression models were adjusted for sex (male, female), age (<65, 65–75, >75), year of operation (2000–2005, 2006–2010, 2011–2015), tumor location (proximal colon, distal colon, rectum), stage (I–II, III, IV), tumor grade (well/moderately differentiated, poorly differentiated), lymphovascular invasion (negative, positive), MMR status (proficient, deficient), and *BRAF* status (wild-type, mutant).

*P*<sub>trend</sub> values were calculated by using the four categories of immune cell densities as continuous variables in univariable and multivariable Cox proportional hazard regression models.

Abbreviations: CI, confidence interval; HR, hazard ratio.

Supplementary figures

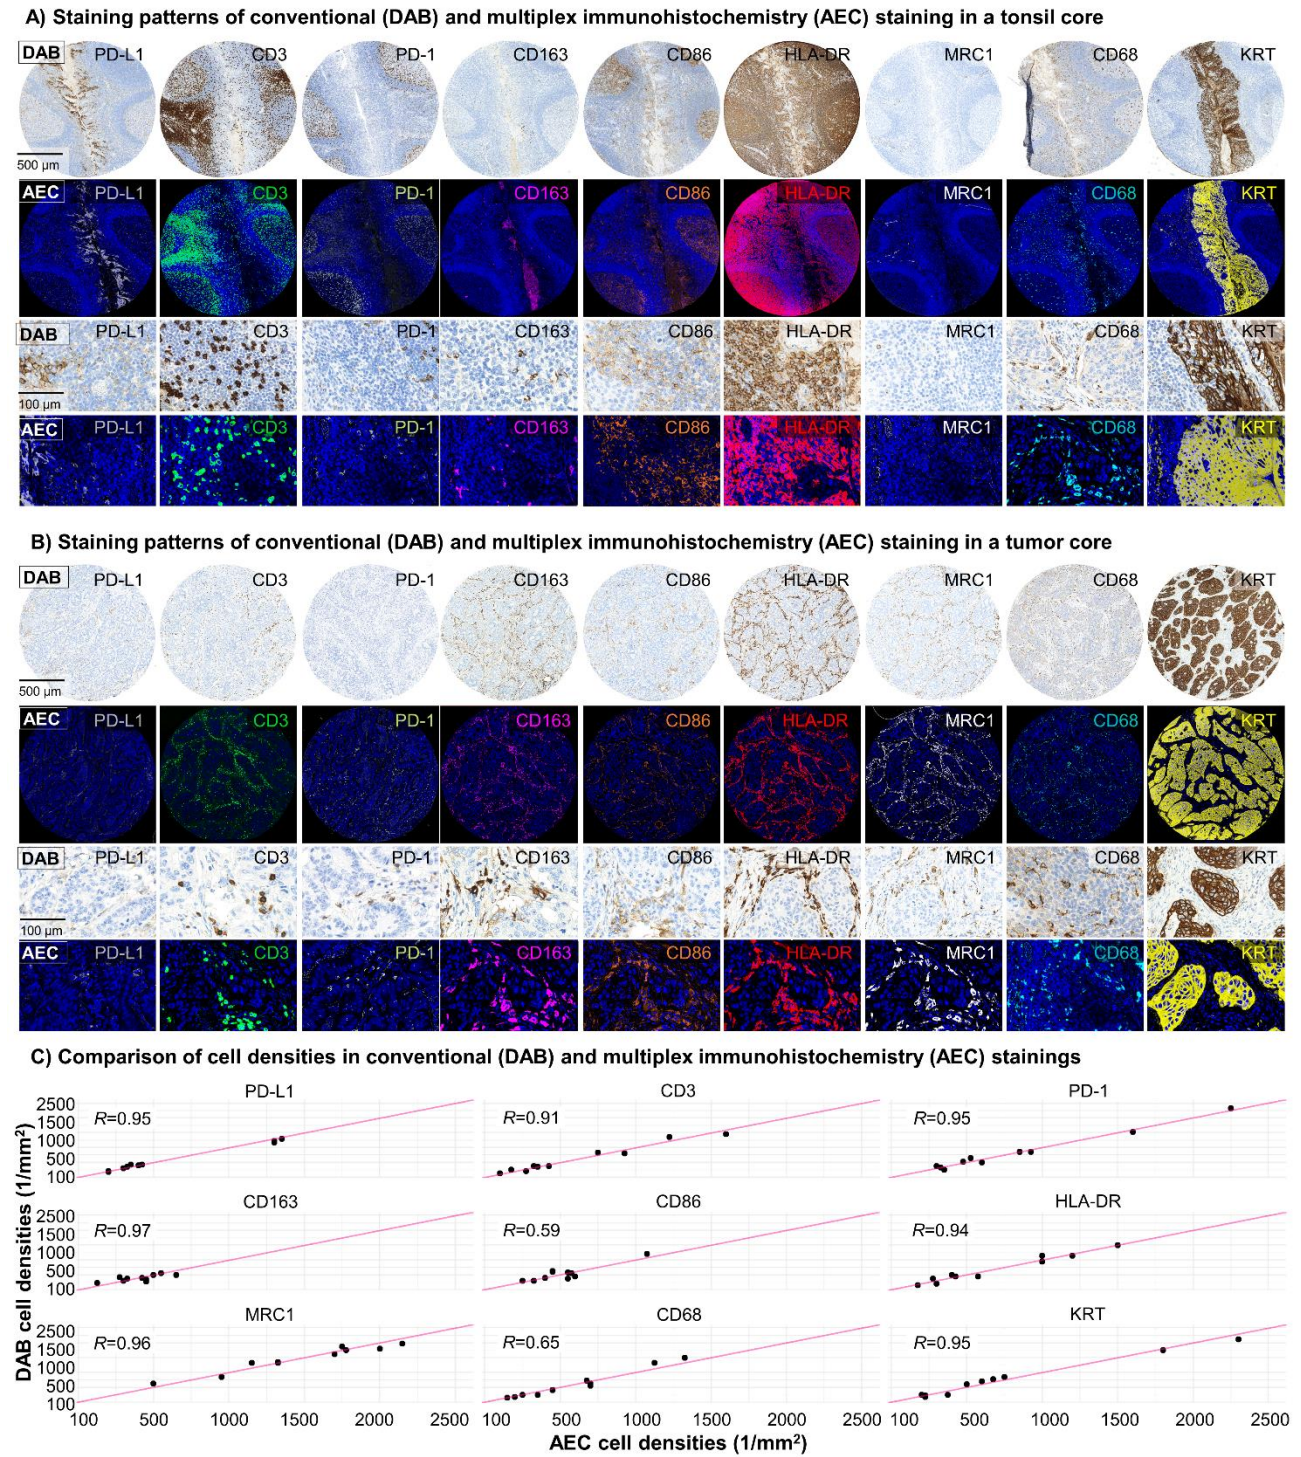

**Figure S1 Comparison of staining patterns in conventional and multiplex immunohistochemistry.** Examples of the staining patterns in 10 serial sections (9 sections for conventional immunohistochemistry and 1 for multiplex immunohistochemistry) of one tonsil core (A) and 10 serial sections of one tumor core (B). Correlations between cell densities in conventional and multiplex immunohistochemistry stainings calculated from 10 tumor regions (size 200 x 200 µm) for each marker. The correlations were measured using Spearman's rank correlation coefficients ( $R$ ).

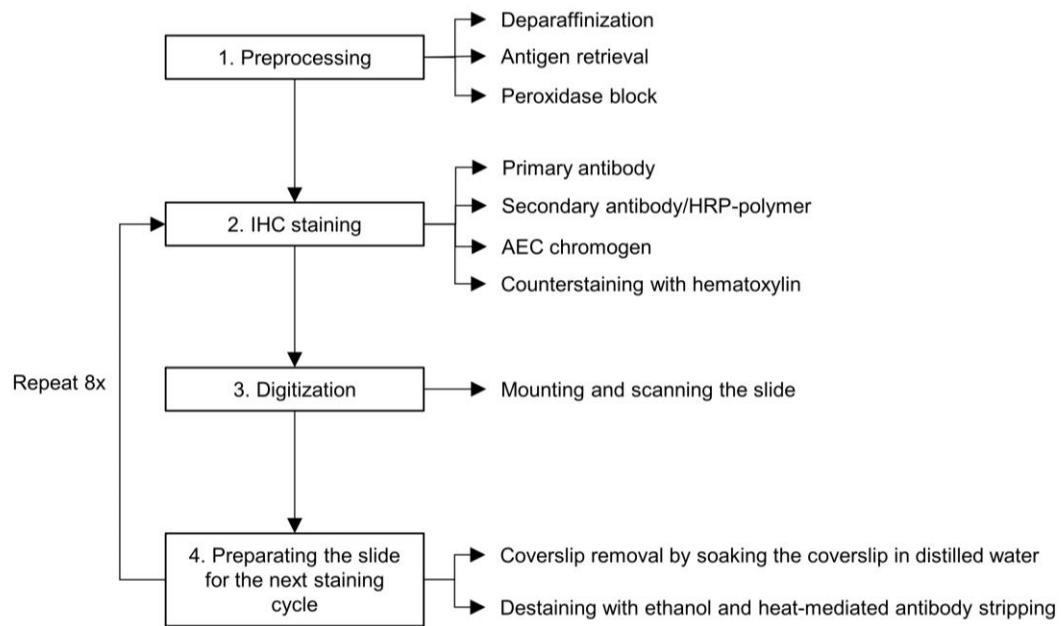

**Figure S2 Multiplex immunohistochemistry staining procedure.** Each slide was stained 9 times sequentially using an automated IHC stainer.



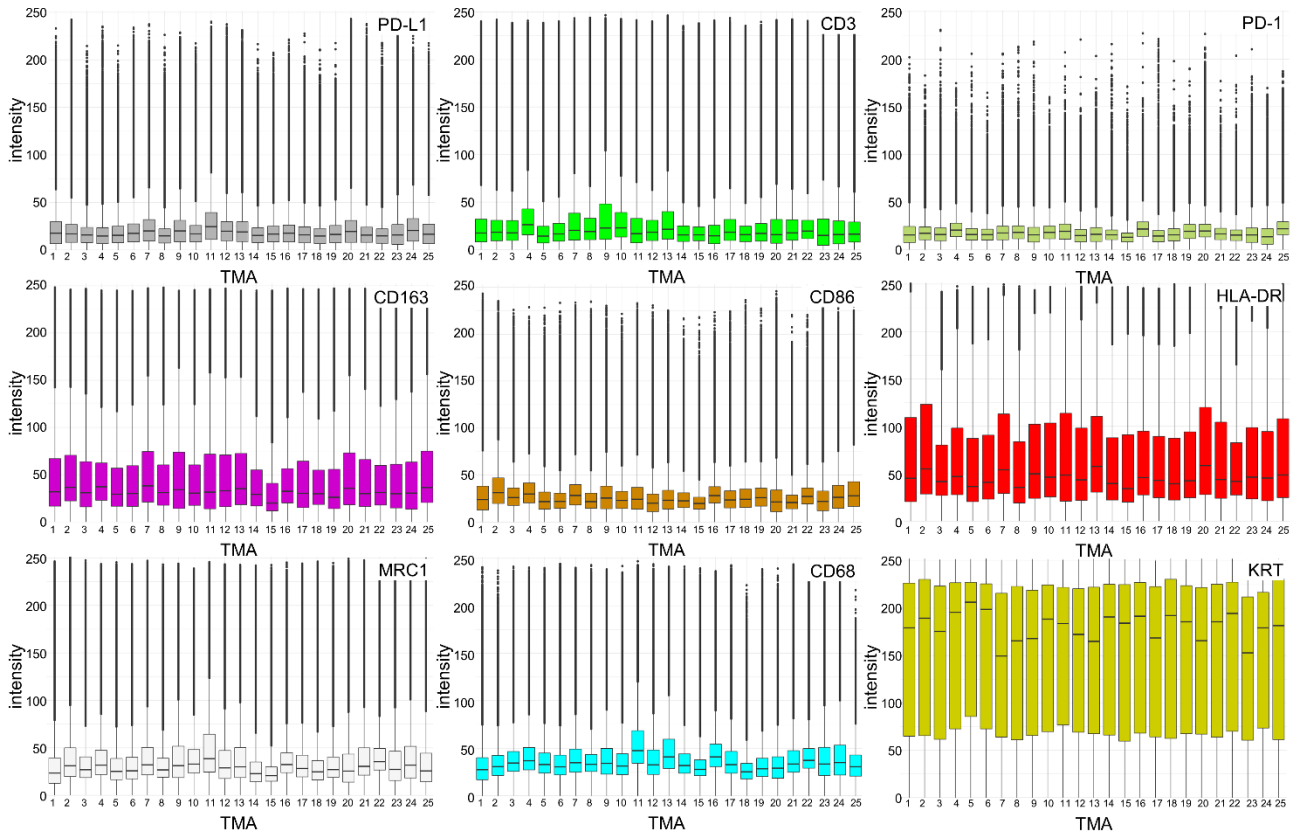

**Figure S3 Staining signal intensities for multiplex immunohistochemistry markers across tissue microarrays.** The boxplots represent intensities across all cells in 25 tissue microarrays included in the study.

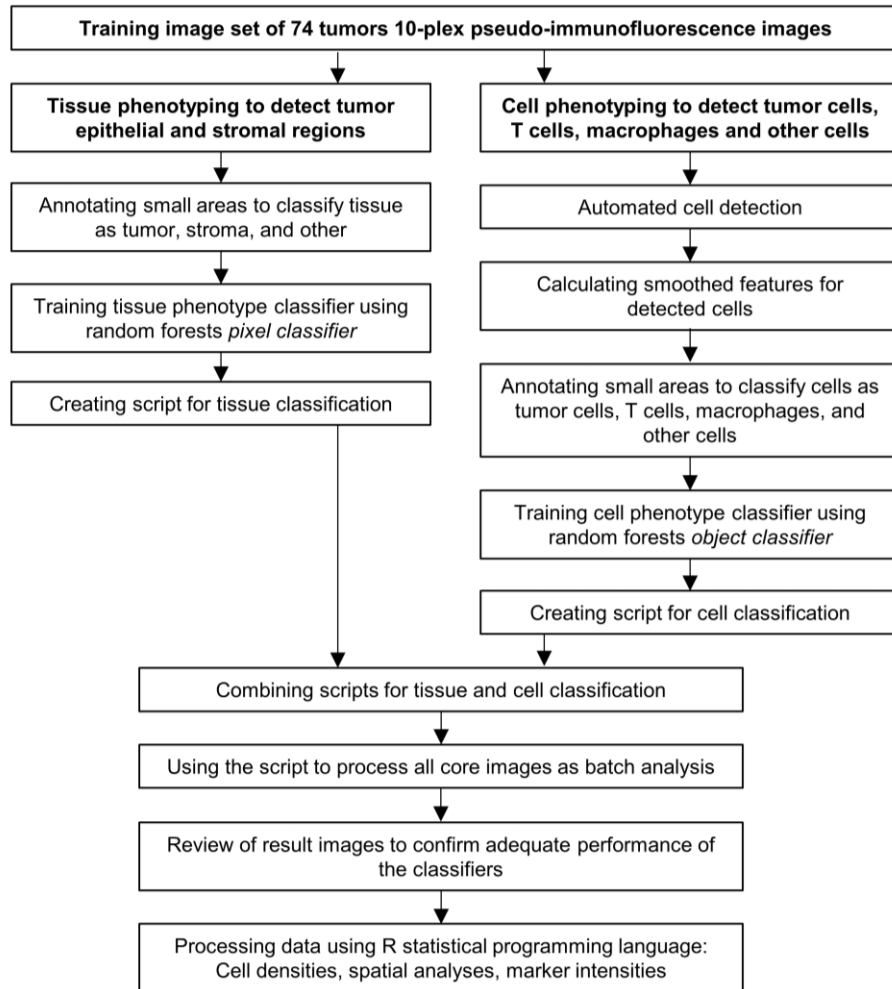

**Figure S4** Flowchart for cell and tissue analysis of the multiplex-immunohistochemistry images in QuPath-software.

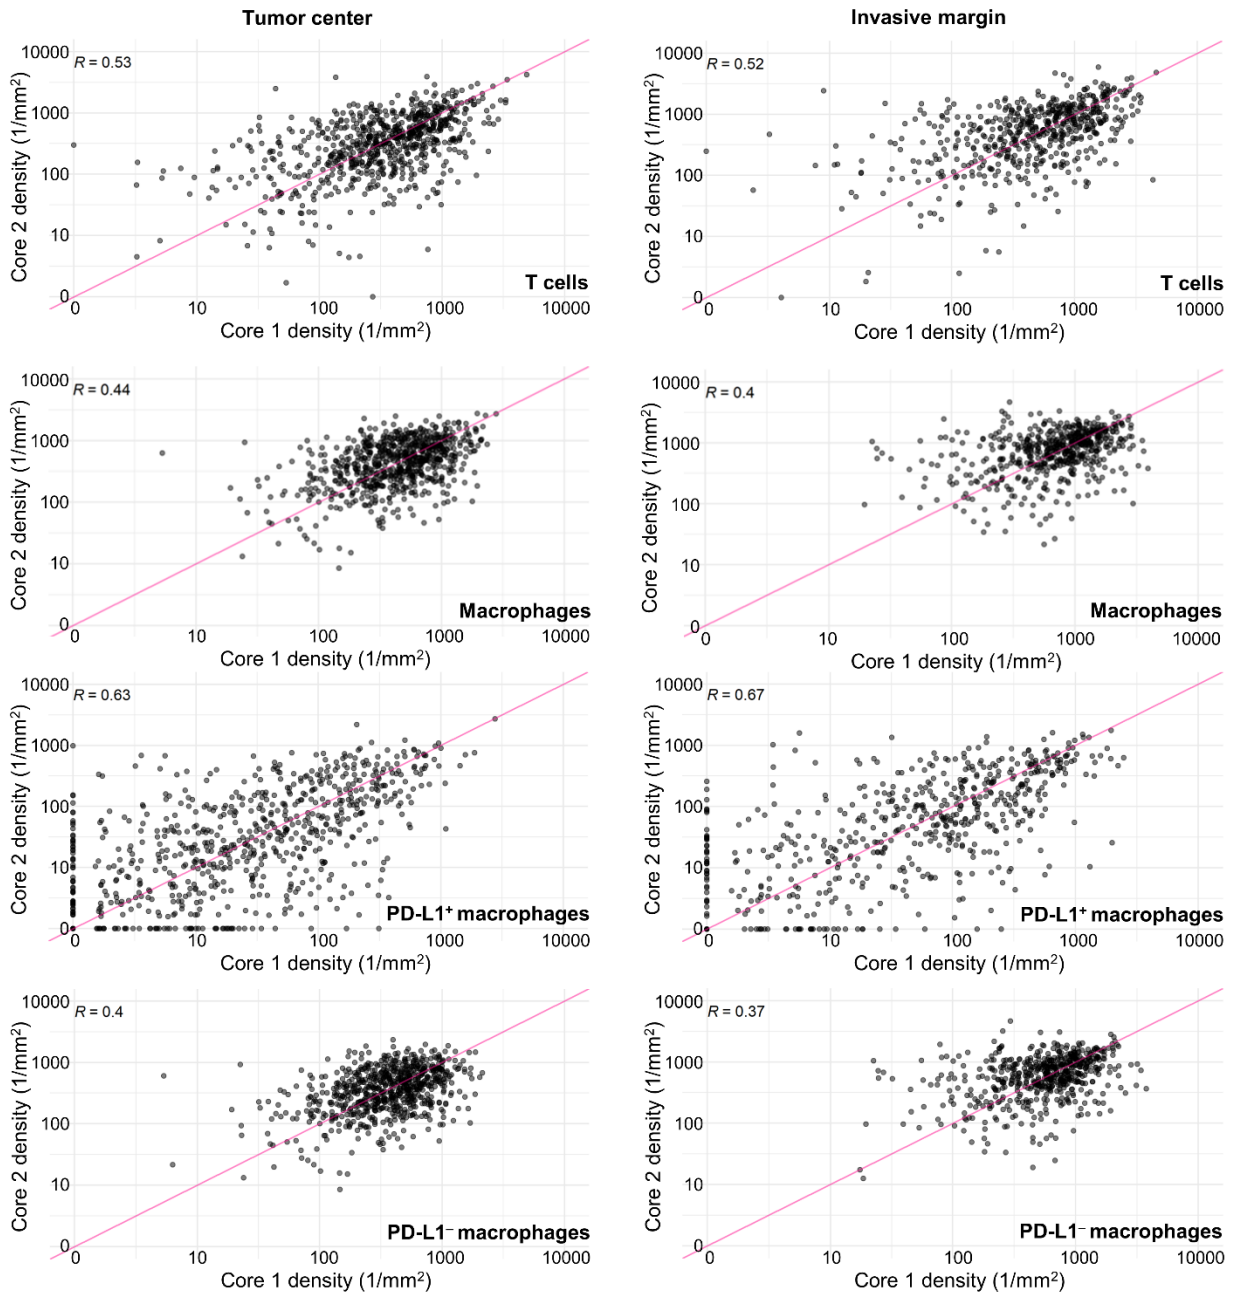

**Figure S5** Core to core-correlations for T cell, macrophage and PD-L1<sup>+</sup> and PD-L1<sup>-</sup> macrophage densities in the tumor center and the invasive margin. Correlations are calculated in two randomly chosen cores of tumors with two or more cores measured using Spearman's rank correlation coefficients (*R*). The correlations are represented separately for the tumor center and the invasive margin. N=761 in the tumor center and N=589 in the invasive margin.

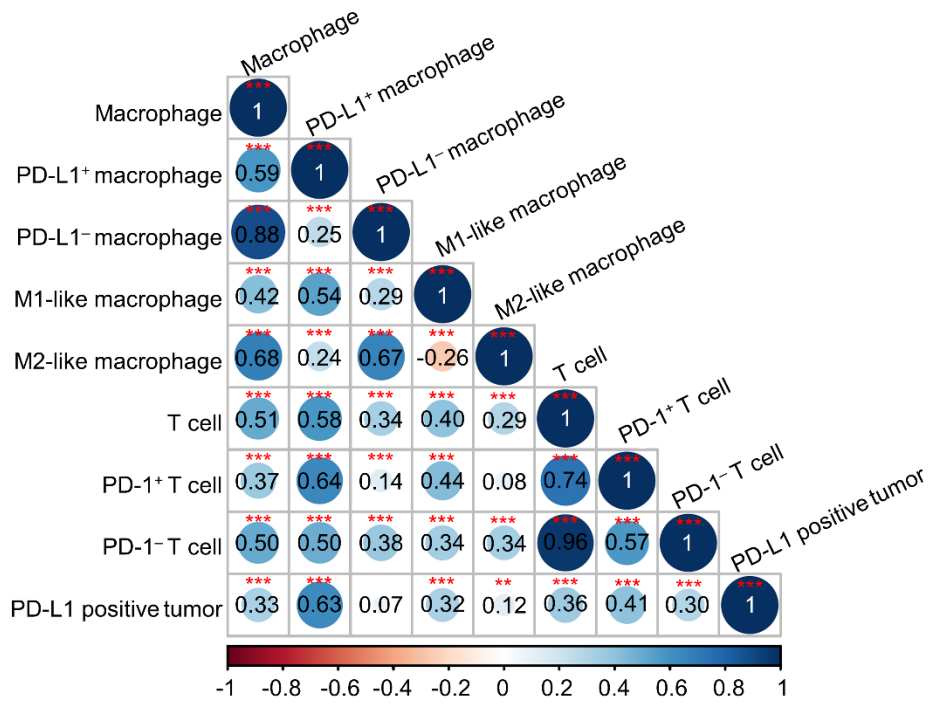

**Figure S6 Spearman correlation coefficients between the total immune cell densities.** Statistically significant correlations are shown with asterisks (\*\*\*) $P < 0.0001$ , (\*\*) $P < 0.001$ , (\*) $P < 0.005$ ).

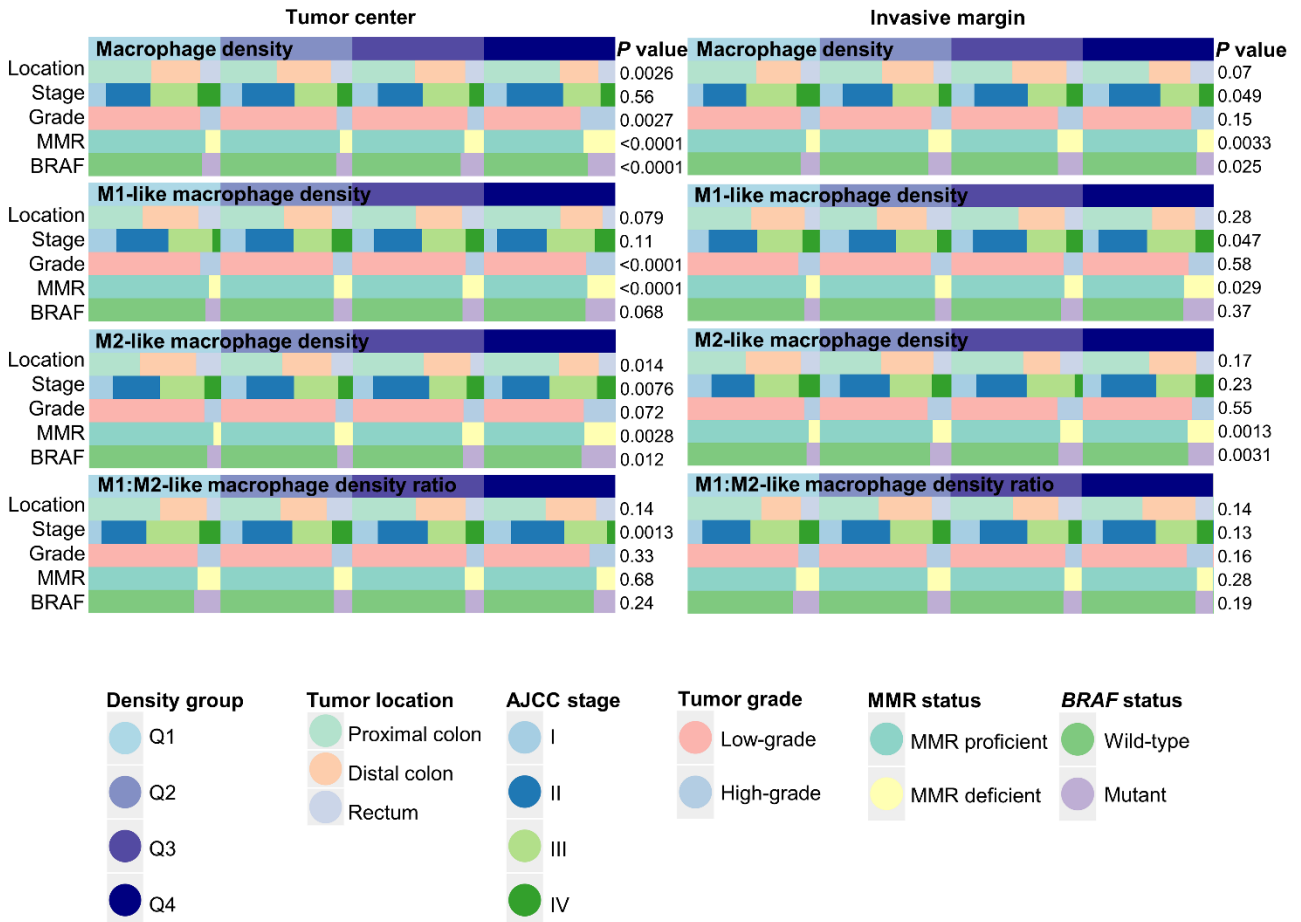

**Figure S7** The clinicopathologic features in relation to total, M1-like, and M2-like macrophage densities and to the density ratio of M1-like and M2-like macrophages in the tumor center and the invasive margin. The densities were divided into ordinal quartiles from low (Q1) to high (Q4). The statistical significance was determined with Chi-square test. Abbreviations: AJCC, American Joint Committee on Cancer; MMR, mismatch repair.

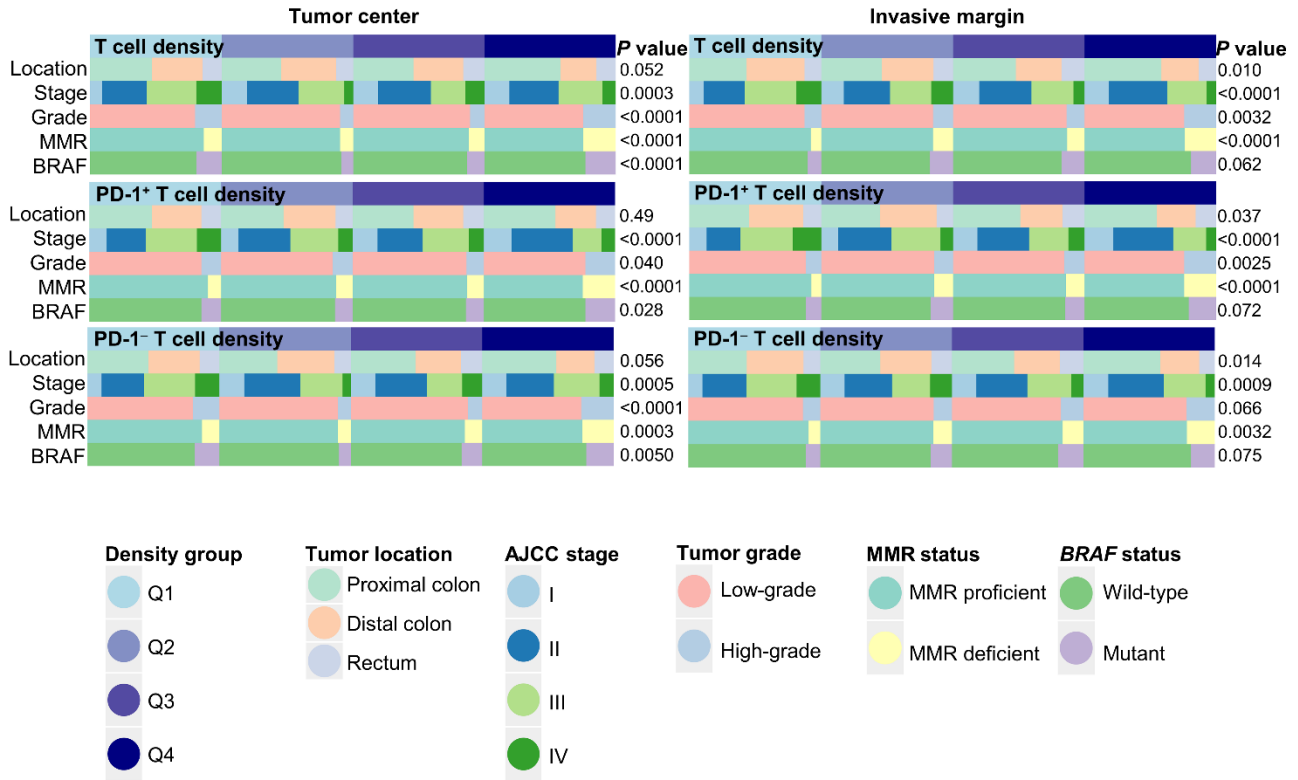

**Figure S8** The clinicopathologic features in relation to total, PD-1<sup>+</sup> and PD-1<sup>-</sup> T cell densities in the tumor center and the invasive margin. The densities were divided into ordinal quartiles from low (Q1) to high (Q4). The statistical significance was determined with Chi-square test. Abbreviations: AJCC, American Joint Committee on Cancer; MMR, mismatch repair.

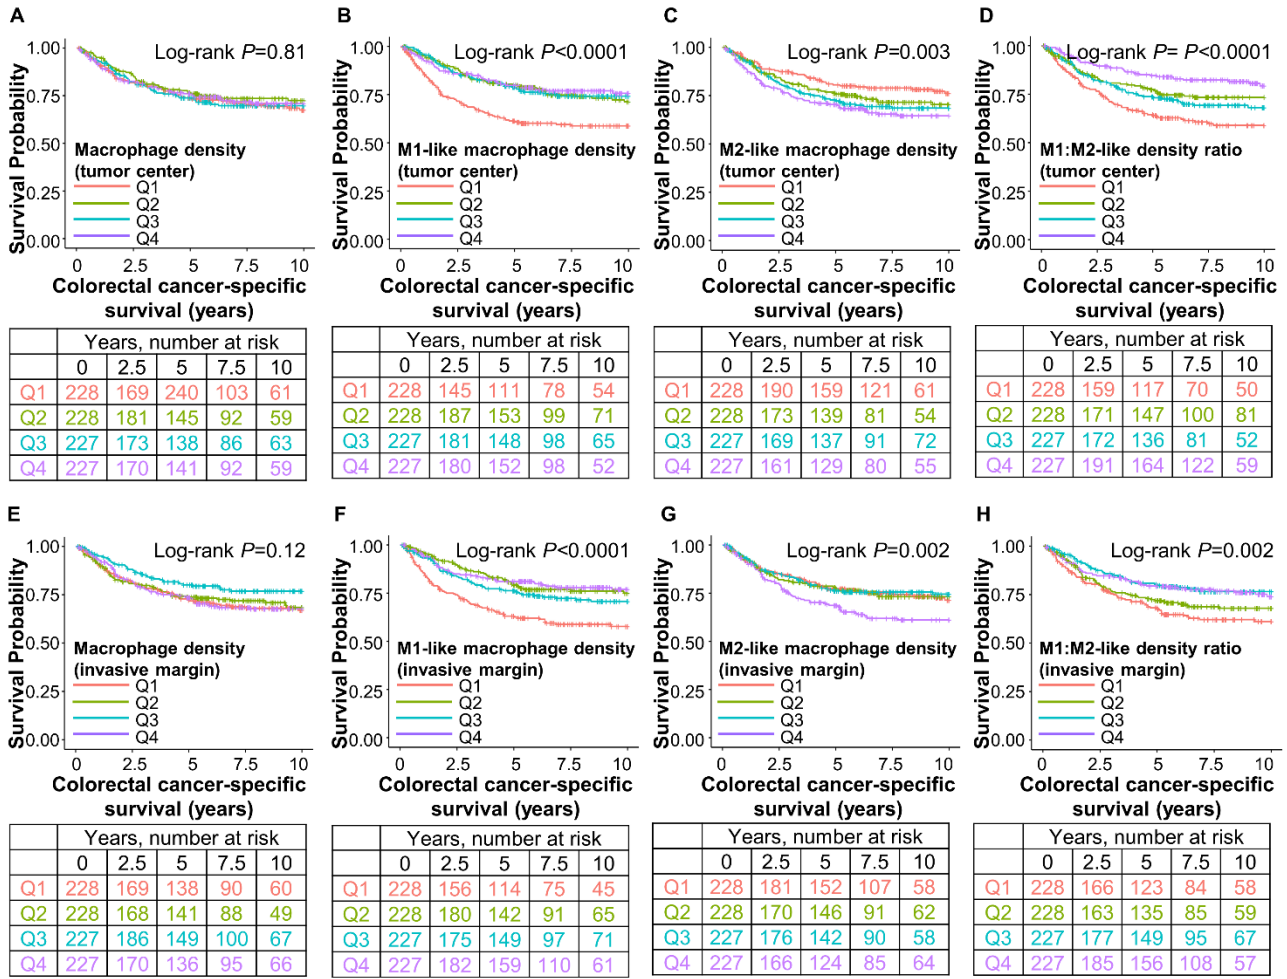

**Figure S9** Kaplan-Meier cancer-specific survival curves for the densities of total, M1-like, and M2-like macrophages and for the density ratio of M1-like and M2-like macrophages in the tumor center and the invasive margin. The densities were divided into ordinal quartiles from low (Q1) to high (Q4). Statistical significance was determined with Log-rank test.

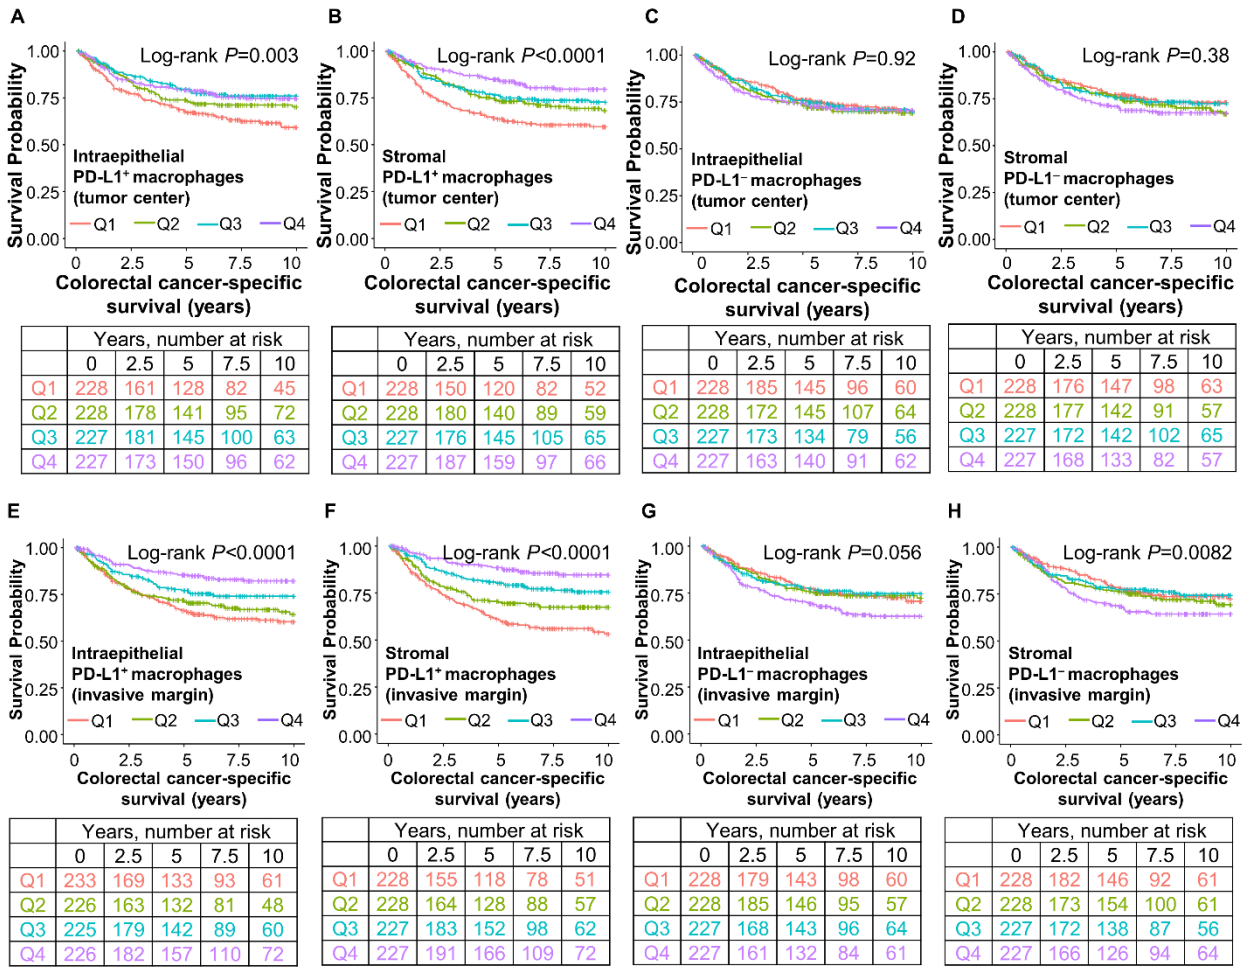

**Figure S10** Kaplan-Meier cancer-specific survival curves for the PD-L1<sup>+</sup> and PD-L1<sup>-</sup> macrophage densities in tumor intraepithelial and stromal regions of the tumor center and the invasive margin. The densities were divided into ordinal quartiles from low (Q1) to high (Q4). Statistical significance was determined with Log-rank test.



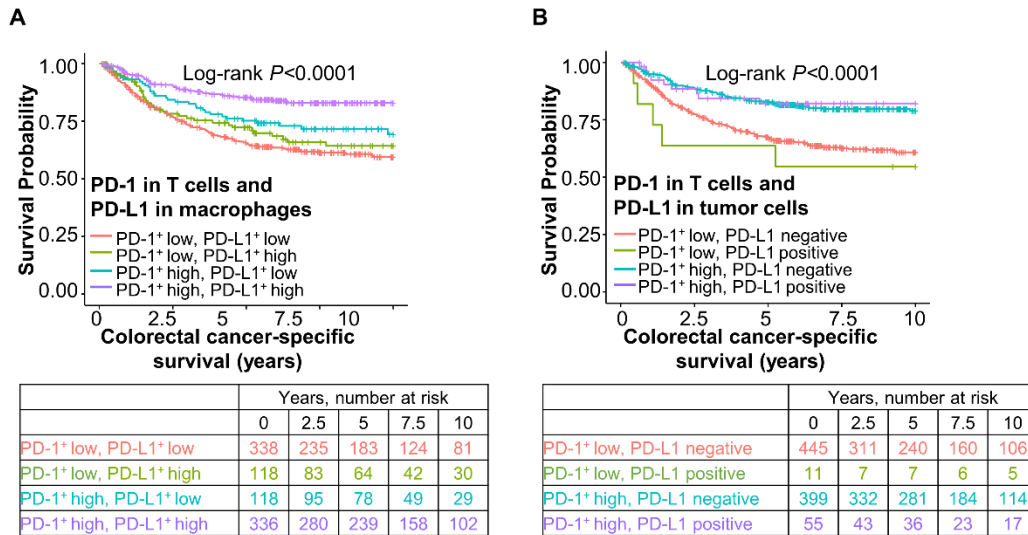

**Figure S11 Kaplan-Meier cancer-specific survival curves according to expression levels of PD-L1 and PD-1. A,** tumors divided into four groups according to low (Q1–Q2) and high (Q3–Q4) density of PD-1<sup>+</sup> T cells and low (Q1–Q2) and high (Q3–Q4) density of PD-L1<sup>+</sup> macrophages. **B,** tumors divided into four groups according to low (Q1–Q2) and high (Q3–Q4) density of PD-1<sup>+</sup> T cells and PD-L1 negativity and positivity in tumor cells. Statistical significance was determined with Log-rank test.

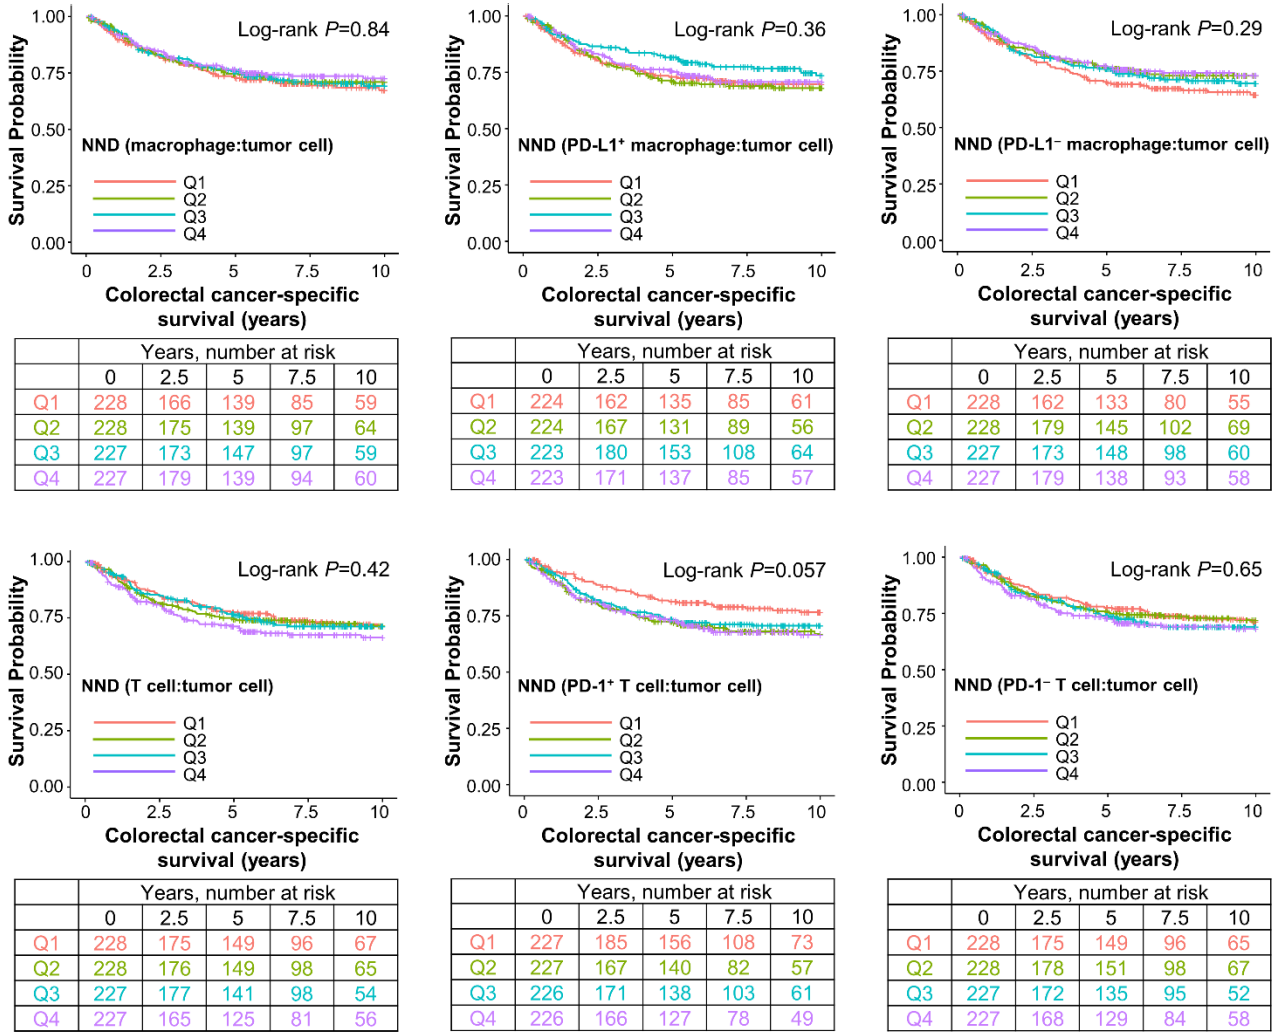

**Figure S12 Kaplan-Meier cancer-specific survival curves for the nearest neighbor distance analyses of immune cells.** Nearest neighbor distance was calculated from each immune cell into the closest tumor cell. The average distances of each tumor were divided into ordinal quartiles from short (Q1) to long (Q4). The significance was tested with Log-rank test.
